# Supplementary material for: Distinct neurexin-cerebellin complexes control AMPA- and NMDA-receptor responses in a circuit-dependent manner
Source: eLife. 2022 Oct 7;11:e78649. doi: 10.7554/eLife.78649 (PMC9586558; doi:10.7554/eLife.78649)
Supplement: Figure 1—figure supplement 1—source data 1. [file elife-78649-fig1-figsupp1-data1.xlsx]

## Sheet: Sheet1
	Figure 1-figure supplement 1A	CV		Figure 1-figure supplement 1B	CV
two-tailed unpaired t-test p-values		p = 0.07833			p = 0.40781
		Cbln2+/+	Cbln2-/-		Cbln2+/+	Cbln2-/-
		0.283274	0.318455		0.510394	0.378946
		0.413363	0.235218		0.466478	0.363447
		0.591713	0.501345		0.433839	0.320181
		0.250436	0.19626		0.323551	0.31304
		0.584567	0.334611		0.495506	0.404839
		0.440945	0.205276		0.551994	0.438977
		0.22587	0.307274		0.334622	0.303801
		0.386925	0.351812		0.412506	0.343412
		0.291032	0.265703		0.300015	0.40942
		0.53069	0.434519		0.393933	0.438346
		0.344179	0.486178		0.308099	0.25821
		0.276004	0.152744		0.228813	0.440679
		0.311585	0.24647		0.310335	0.332809
		0.343986	0.270517		0.514392	0.286883
		0.389499	0.325379		0.230474	0.386885
		0.269525	0.140768		0.368241
		0.350603			0.434893
		0.336981			0.323005
		0.303844			0.278618
					0.318176
					0.571046

## Sheet: Sheet2
0.840098	0.779248
0.373874	0.288988
0.20399	0.157383
0.16302	0.300793
0.124817	0.247329
0.134661	0.267813
0.142455	0.187631
0.75517	0.521872
0.557251	0.0861973
0.398574	0.335084
0.273884	0.284162
0.255101	0.195644
0.383456	0.168125
0.270107	0.0554434
1.42602	1.35659
0.259077	0.492646
0.568395	0.415467
0.442567	0.373569
0.469025	0.370256
0.639181	0.335788
0.337728	0.165096
0.84371	0.295013
0.214809	0.276347
0.0947284	0.292094
0.180212	0.139724
0.08811	0.137798
0.208722	0.16769
0.122759	0.0651553
1.17523	0.618245
0.966546	0.651305
0.441548	0.268775
0.360904	0.304743
0.449925	0.148201
0.283599	0.216723
0.414218	0.134286
1.02913	0.417875
0.71075	0.146277
0.519769	0.248009
0.199502	0.207055
0.273455	0.18345
0.159207	0.107429
0.1948	0.126836
0.453722	0.831706
0.388324	0.324443
0.264034	0.387917
0.144599	0.220217
0.166335	0.16361
0.0639621	0.0779102
0.100113	0.145116
0.636478	0.834927
0.395006	0.426247
0.396867	0.306445
0.472726	0.310554
0.277836	0.321766
0.262048	0.152479
0.267517	0.110269
0.706965	0.656927
0.404526	0.205417
0.267551	0.183657
0.218216	0.260559
0.163809	0.231704
0.112605	0.189486
0.163549	0.132169
0.669801	1.14861
0.524306	0.541544
0.559818	0.351258
0.308384	0.298035
0.968068	0.293175
0.394016	0.192472
0.290435	0.216538
0.647934	0.959496
0.652533	0.438995
0.162835	0.47726
0.302513	0.498984
0.254569	0.225704
0.245784	0.45243
0.143083	0.35038
0.582432	0.275464
0.389485	0.178201
0.0714926	0.214386
0.32823	0.124206
0.190491	0.0753222
0.242784	0.0664735
0.127112	0.135156
0.410135	0.603214
0.302922	0.234337
0.369239	0.269497
0.335781	0.12222
0.419726	0.225825
0.182353	0.125492
0.160938	0.144704
0.608757	0.738146
0.428423	0.449012
0.490098	0.302033
0.357049	0.122457
0.200253	0.103873
0.141467	0.0792566
0.181853	0.0988439
0.737421	0.885255
0.304917	0.496965
0.355744	0.322317
0.190703	0.142091
0.340913	0.258178
0.441024	0.0454454
0.35577	0.1274
0.168448	0.299207
0.3265	0.175101
0.248321	0.192829
0.528737	0.0453274
0.157332	0.116164
0.210684	0.0791853
0.246655	0.0775629
0.426468
0.363405
0.396541
0.400278
0.218462
0.363197
0.285867
0.942994
0.395354
0.185842
0.197626
0.231347
0.196494
0.209208
0.301546
0.666256
0.423803
0.350268
0.153799			0.283274	0.413363	0.591713	0.250436	0.584567	0.440945	0.22587	0.386925	0.291032	0.53069	0.344179	0.276004	0.311585	0.343986	0.389499	0.269525	0.350603	0.336981	0.303844
0.0768054
0.154429			0.318455	0.235218	0.501345	0.19626	0.334611	0.205276	0.307274	0.351812	0.265703	0.434519	0.486178	0.152744	0.24647	0.270517	0.325379	0.140768
			0.510394	0.466478	0.433839	0.323551	0.495506	0.551994	0.334622	0.412506	0.300015	0.393933	0.308099	0.228813	0.310335	0.514392	0.230474	0.368241	0.434893	0.323005	0.278618	0.318176	0.571046
0.0281322
			0.378946	0.363447	0.320181	0.31304	0.404839	0.438977	0.303801	0.343412	0.40942	0.438346	0.25821	0.440679	0.332809	0.286883	0.386885
