# Supplementary material for: Distinct neurexin-cerebellin complexes control AMPA- and NMDA-receptor responses in a circuit-dependent manner
Source: eLife. 2022 Oct 7;11:e78649. doi: 10.7554/eLife.78649 (PMC9586558; doi:10.7554/eLife.78649)
Supplement: Figure 1—figure supplement 2—source data 1. [file elife-78649-fig1-figsupp2-data1.xlsx]

## Sheet: Sheet1
	Figure 1-figure supplement 2B		Stimulation Itensity (mA)							Slope		Figure 1-figure supplement 2C	Interstimulus interval (ms)					Figure 1-figure supplement 2D		Stimulation Itensity (mA)							Slope		Figure 1-figure supplement 2E	Interstimulus interval (ms)					Figure 1-figure supplement 2F		Stimulation Itensity (mA)							Slope		Figure 1-figure supplement 2G	Interstimulus interval (ms)
two-tailed unpaired t-test p-values	AMPAR EPSCs	Cbln2f/f	10	20	30	40	50	75	100	p = 0.04514		Cbln2f/f	20	80	200	800	2000	NMDAR EPSCs	Cbln2f/f	10	20	30	40	50	75	100	p = 0.00718		Cbln2f/f	20	80	200	800	2000	AMPAR EPSCs	Cbln2f/f	10	20	30	40	50	75	100	p = 0.02984		Cbln2f/f	20	80	200
with comparing to control for all panels	Cbln2cko to Cbln2f/f : p = 0.0007	cell1	5.06807	148.33	319.887	433.827	404.698	474.761	559.065	Cbln2f/f	Cbln2cko	cell1	1.95524	1.90976	1.5157	0.911393	0.892256	Cbln2cko to Cbln2f/f : p < 0.0001	cell1	2.78993	14.8872	52.3162	110.039	154.649	194.33	175.856	Cbln2f/f	Cbln2cko	cell1	0.991621	1.03702	0.862468	1.03953	0.955406	Cbln2cko to Cbln2f/f : p < 0.0001	cell1	1.42911	27.7959	30.9169	57.0571	92.7269	129.753	146.017	Cbln2f/f	Cbln2cko	cell1	1.92277	1.08868	0.798166
except input/output curves and PPR using two-way ANOVA		cell2	2.36206	33.4812	53.4198	121.108	124.905	202.532	272.262	10.8476	6.01251	cell2	1.76196	1.07834	1.30891	0.791181	1.04842		cell2	18.7373	46.22	198.694	192.348	207.593	265.226	275.581	3.9887	1.07758	cell2	1.29844	1.14718	0.997774	0.93098	0.872982		cell2	3.04203	94.9507	195.385	159.372	173.631	238.185	197.471	2.11857	6.31195	cell2	1.63482	1.50258	1.41923
		cell3	7.36826	44.4886	71.3507	72.2902	85.1485	133.639	124.436	3.32712	7.96449	cell3	1.85284	1.06624	0.842016	0.840133	0.92749		cell3	7.75846	40.7417	78.4771	105.812	125.494	167.831	154.275	5.2384	2.87083	cell3	1.17697	0.973792	0.989395	0.87395	0.909022		cell3	28.327	65.9787	84.0139	63.0703	53.0673	73.0688	73.726	4.056	2.98769	cell3	1.60562	1.12008	1.12512
		cell4	2.12182	14.4844	55.0558	46.4489	89.2412	161.905	205.474	1.83362	11.6405	cell4	1.62175	1.17005	1.06537	0.842177	0.99914		cell4	3.46539	40.4859	119.649	237.463	271.268	353.096	398.244	3.00542	1.53542	cell4	1.80731	1.19712	1.13214	0.939429	0.942803		cell4	3.10739	50.6691	96.7706	133.335	114.22	153.512	201.403	0.465723	2.43935	cell4	1.09368	1.83689	0.919994
		cell5	6.10664	145.357	161.761	189.83	245.871	313.807	387.914	2.06203	7.31927	cell5	1.57385	1.5579	1.23585	1.29178	0.654301		cell5	4.03105	69.5055	90.3611	191.421	204.459	355.602	336.191	7.32582	4.5906	cell5	1.35087	1.56769	1.29871	1.00643	0.909571		cell5	3.74173	182.666	253.257	348.348	290.271	392.266	412.407	3.0489	3.72628	cell5	2.13256	1.50814	1.37599
		cell6	8.42627	33.4049	35.6441	47.6911	106.393	162.584	242.323	5.24001	5.11421	cell6	0.927867	1.84411	1.39504	0.836629	1.02335		cell6	2.56156	27.1734	39.7857	104.343	186.525	245.664	288.191	5.22771	4.99493	cell6	1.44584	1.20229	1.187	0.943301	0.960544		cell6	2.55035	20.3042	34.2875	38.4597	59.2172	85.485	94.549	7.3874	3.41023	cell6	2.1343	1.38741	1.15963
		cell7	6.17757	43.2348	54.1046	60.5965	66.1974	122.794	172.396	2.1022	8.21457	cell7	1.96838	2.12292	1.16752	1.24626	0.933043		cell7	2.49711	12.8789	30.2955	52.2676	91.8485	150.643	188.093	4.45097	0.762954	cell7	1.35502	1.22354	1.15047	0.90941	0.958083		cell7	1.30174	15.1596	22.1265	36.3881	49.3977	81.8708	135.186	1.31489	1.05823	cell7	2.08144	1.53584	1.09035
		cell8	10.0887	39.9541	48.5922	62.8499	95.3254	86.1557	168.176	1.37402	2.05195	cell8	1.63813	1.60082	1.2322	1.00114	1.05813		cell8	9.05737	62.7623	170.073	289.388	344.675	428.678	456.662	2.18092	1.44922	cell8	1.20774	1.27884	1.30571	0.874055	0.998821		cell8	2.51055	13.497	27.3066	30.1446	31.5682	68.1471	71.3082	1.1742	3.68734	cell8	2.06688	1.84296	1.31207
		cell9	5.05927	60.6317	119.88	143.555	165.59	219.7	234.269	1.93369	3.22659	cell9	1.56552	1.76623	0.859874	0.836633	1.18438		cell9	9.19731	16.4053	55.5173	94.738	136.083	190.412	224.241	8.97861	2.44966	cell9	1.26799	1.25736	1.12151	0.974694	0.872858		cell9	8.79125	68.6965	78.1991	156.889	210.284	299.114	317.169	0.747629	4.81102	cell9	1.80597	2.83904	1.07934
		cell10	14.9024	102.093	140.817	188.965	229.904	293.354	330.807	4.03984	2.22259	cell10	1.59264	1.25662	0.969103	0.785707	1.03031		cell10	8.34588	56.8786	149.82	219.166	299.64	434.68	483.533	3.32104	2.8422	cell10	0.992664	1.05474	0.911798	0.944914	1.02016		cell10	8.1494	13.5321	24.9506	56.9406	40.9609	72.6779	81.5466	4.91178	1.78664	cell10	1.79737	1.7027	1.02466
		cell11	33.0278	94.2152	109.77	185.004	178.999	260.456	316.967	5.16875	4.31348	cell11	1.75511	1.26412	1.11726	1.1001	0.938372		cell11	3.66396	27.9278	80.6066	150.002	224.781	290.981	353.292	7.44876	1.70826	cell11	1.0029	1.11332	1.13142	0.936029	0.875826		cell11	5.5228	18.2116	50.6864	65.9154	66.8718	106.754	149.19	1.09031	6.46657	cell11	2.15773	1.40981	1.32352
		cell12	30.3284	94.3961	150.753	159.183	203.772	276.784	274.234	3.8273	3.5295	Cbln2cko							cell12	6.64313	25.5714	39.5276	57.2793	76.2454	123.004	141.133	5.64308		cell12	1.21469	1.31263	1.02693	0.963328	0.894698		cell12	8.17466	70.3228	70.7561	66.443	83.8412	104.654	106.739	1.70402	11.477	cell12	0.823433	1.18487	1.27097
		cell13	8.97599	16.7823	36.4683	75.3868	147.661	304.476	406.312	4.11675	2.94448	cell1	2.36536	1.58211	1.43351	1.3841	1.00472		Cbln2cko								1.70912		Cbln2cko							cell13	21.9771	32.5502	34.9718	70.7053	71.1489	99.9037	76.6576	1.47453	3.65807	cell13	1.65375	1.98656	1.15821
		Cbln2cko								3.35975	9.78453	cell2	2.17098	1.76215	1.45756	1.0197	1.05668		cell1	1.43247	8.29414	26.4005	36.3481	41.2843	58.0734	71.6732			cell1	1.82878	1.62519	1.19404	1.04826	0.868051		cell14	23.7832	84.4198	122.974	182.913	162.277	246.081	307.018	1.36499	3.71955	cell14	1.92327	1.52271	1.476
		cell1	3.93818	72.5314	98.2367	157.34	262.159	265.494	384.977		11.046	cell3	1.95919	1.64199	1.19481	1.01774	1.22256		cell2	3.58355	29.9759	73.509	87.6562	118.285	155.168	170.452			cell2	0.995373	1.0873	1.00508	0.915531	1.0611		cell15	12.6323	39.0123	71.0026	66.1173	99.0355	112.629	190.078	3.75481	2.48524	cell15	2.322	1.86112	1.38057
		cell2	3.04663	74.0155	192.314	252.828	311.865	364.76	449.473		5.59326	cell4	1.49658	0.974372	1.07933	1.10225	1.03226		cell3	3.50958	7.5428	19.5295	35.8523	66.1256	98.134	126.103			cell3	1.16848	1.21601	0.849589	0.792246	0.909654		cell16	1.64276	54.7416	55.6012	120.83	114.462	190.462	194.074	1.99911	3.20852	cell16	1.45598	1.36705	1.33358
		cell3	18.8929	139.168	290.537	394.719	473.141	642.787	904.677			cell5	1.80324	1.3761	0.811512	1.27024	0.960356		cell4	3.11712	4.25865	50.2388	115.74	176.906	260.423	295.165			cell4	0.978063	0.950828	0.913166	0.775028	0.866697		cell17	3.79569	60.6883	95.6034	96.4364	121.559	121.314	141.018	2.91727		Cbln2cko
		cell4	17.3605	89.5285	163.231	283.237	286.47	418.107	586.857			cell6	2.16746	1.28363	1.25178	0.971142	0.979232		cell5	4.77318	29.6461	71.9687	148.63	195.028	268.549	311.916			cell5	1.33073	1.0028	1.08075	0.953732	0.950173		cell18	5.70607	51.6511	62.9718	102.164	87.2795	153.612	153.614	2.71275		cell1	1.54348	1.24372	1.42472
		cell5	2.13936	9.18579	31.1849	129.542	197.672	267.978	400.059		0.0451446	cell7	1.88021	1.519	0.988217	0.701233	0.929274		cell6	2.19902	1.44665	2.92813	19.3212	31.4094	60.9346	100.021			cell6	2.32355	1.74535	1.34407	1.07818	0.777508		cell19	10.7144	40.2893	75.2819	66.8259	103.379	204.164	328.721	2.1366		cell2	1.62957	1.54035	1.19396
		cell6	2.81748	14.4345	110.914	225.359	308.084	475.831	605.404			cell8	1.77034	1.48395	0.959161	0.851346	0.88674		cell7	2.77622	6.52542	13.2399	31.481	62.7595	110.962	159.44			cell7	1.03678	0.906804	0.835003	0.83523	0.869712		Cbln2cko								2.11865		cell3	1.50512	1.68592	1.11937
		cell7	5.21524	18.0175	43.29	67.5656	83.0385	100.442	112.052			cell9	1.83745	1.51353	1.04319	1.02443	0.991225		cell8	2.23366	7.19819	19.0113	49.4136	103.609	171.13	250.274			cell8	1.48413	0.993517	1.03428	0.897103	0.828088		cell1	8.39101	116.523	182.005	236.037	264.231	282.262	307.973			cell4	2.17463	2.02047	1.12076
		cell8	3.58455	12.0043	39.6805	89.7565	126.038	209.926	245.477										cell9	1.88738	4.41558	24.2181	70.6618	110.874	214.764	313.633			cell9	1.50546	1.1245	1.21614	0.898296	0.855857		cell2	32.6458	78.7223	127.83	102.064	170.36	176.575	245.27			cell5	1.09093	1.25978	1.14565
		cell9	1.87272	11.0453	31.0578	65.9055	85.5718	219.741	300.683										cell10	3.69965	13.3193	30.2659	49.2989	71.123	168.037	149.233			cell10	0.980547	0.851339	0.846707	0.807153	1.03259		cell3	3.96461	49.4192	52.3457	73.231	114.026	169.548	182.974			cell6	1.65819	1.75652	1.1052
		cell10	13.9434	69.1289	70.8598	126.666	200.849	277.826	300.577																											cell4	21.505	43.6553	102.828	143.826	157.734	203.889	322.663			cell7	1.0379	1.18697	1.32733
		cell11	4.51138	13.1709	36.5908	70.968	152.088	176.049	180.867																											cell5	15.787	68.7309	97.3698	151.99	144.669	131.518	175.717			cell8	1.67418	1.89334	1.10532
		cell12	6.94807	91.2933	108.259	124.476	137.581	216.802	262.392																											cell6	1.80108	23.0797	34.9408	49.0342	41.7351	85.5605	110.81			cell9	2.06377	1.49617	1.24795
		cell13	36.5766	98.2435	234.343	328.32	410.765	288.771	400.596																											cell7	3.67737	48.8823	99.814	159.36	132.806	174.507	218.665			cell10	2.05955	1.11813	1.09317
		cell14	28.7004	141.031	229.802	318.317	492.357	643.596	823.374																											cell8	8.71065	50.0507	72.1234	179.333	184.621	265.454	355.175			cell11	1.32341	1.46766	1.70238
		cell15	19.3323	36.8954	111.545	155.932	239.477	351.627	464.533																											cell9	6.99935	17.2879	34.4716	78.8179	65.5663	98.2567	99.2683			cell12	1.21236	1.73884	1.09231
																																				cell10	3.64481	16.455	121.136	187.542	241.43	321.293	369.361			cell13	2.11433	1.30191	0.972457
																																				cell11	4.28797	101.614	234.348	375.645	441.12	543.843	591.178
																																				cell12	57.7391	161.203	208.076	229.803	206.343	342.334	350.681
																																				cell13	0.652409	82.8356	128.657	144.245	155.925	203.509	218.907
																																				cell14	17.6417	25.4254	35.9523	87.6157	110.808	136.61	131.264
																																				cell15	9.91818	20.7905	40.2961	113.195	124.142	220.085	268.299
[truncated: 19 more columns]
