# Supplementary material for: Distinct neurexin-cerebellin complexes control AMPA- and NMDA-receptor responses in a circuit-dependent manner
Source: eLife. 2022 Oct 7;11:e78649. doi: 10.7554/eLife.78649 (PMC9586558; doi:10.7554/eLife.78649)
Supplement: Figure 1—source data 1. [file elife-78649-fig1-data1.xlsx]

## Sheet: Sheet1
	Figure1B		Stimulation Itensity (mA)							Slope		Figure1C		Stimulation Itensity (mA)							Slope		Figure1D	Cbln2+/+												Cbln2-/-													Figure1E-F
two-tailed unpaired t-test p-values	AMPAR EPSCs	Cbln2+/+	10	20	30	40	50	75	100	p = 0.00410		NMDAR EPSCs	Cbln2+/+	10	20	30	40	50	75	100	p = 0.01120		Time (min)	cell1	cell2	cell3	cell4	cell5	cell6	cell7	cell8	cell9	cell10	cell11	cell12	cell1	cell2	cell3	cell4	cell5	cell6	cell7	cell8	cell9	cell10	cell11	cell12	cell13
with comparing to control for all panels	KO to WT: p < 0.0001	cell1	15.4741	173.477	260.195	434.968	400.524	528.279	685.629	Cbln2+/+	Cbln2-/-	KO to WT: p < 0.0001	cell1	5.48345	28.9556	80.9588	131.808	160.999	226.331	238.302	Cbln2+/+	Cbln2-/-	-4	1.14314	1.18264	1.09213	0.805574	1.06065	0.994371	1.15517	1.15612	0.822652	1.13417	0.810996	0.84851	0.93705	1.04042	1.24436	0.967431	0.881509	1.32027	0.916768	0.812101	1.196	1.08053	1.08352	1.07072	1.00276
except input/output curves using two-way ANOVA		cell2	10.7772	33.4183	46.4845	100.134	78.0394	88.0783	99.1034	10.3159	3.05605		cell2	4.34247	36.4215	61.875	121.78	167.326	254.701	301.261	4.13883	2.47331	-3	0.922178	1.08237	1.19673	0.865968	1.02029	0.910144	1.25748	1.10849	0.962549	0.959199	1.13078	1.37751	1.02952	1.05741	1.39874	1.03815	1.00917	1.07003	0.776753	0.960422	1.27644	1.18475	1.07417	0.865974	1.29872
		cell3	2.39943	10.9061	49.478	36.5235	47.7595	48.2752	85.3322	2.0124	8.58708		cell3	5.04496	30.9958	74.2508	118.941	205.196	320.856	366.059	4.11325	2.02879	-2	1.16259	1.32972	0.973177	0.639299	0.958903	0.919812	0.961209	0.950724	1.03612	1.18448	1.19427	1.13883	0.831613	0.923275	1.13128	1.07296	1.04439	0.993774	0.775072	1.00503	1.18034	1.21112	0.864618	1.09395	0.885754
		cell4	29.4545	80.2588	127.093	174.749	196.224	220.547	263.166	1.16337	2.97494		cell4	6.20753	7.22777	38.0023	85.4021	152.761	239.06	296.662	4.88248	2.3559	-1	0.991023	0.877843	0.935801	0.945779	0.957974	0.832862	1.06361	0.929235	1.07442	0.996571	0.936343	1.14063	0.978571	0.982472	1.19182	1.15088	1.19253	1.44758	1.0681	0.985606	1.36567	1.06336	1.02185	0.92335	1.0423
		cell5	3.66535	32.6098	68.2066	87.156	77.8254	118.184	110.948	4.28029	8.71149		cell5	6.03878	11.1789	37.7602	48.9972	77.0166	114.128	163.084	3.71281	2.49275	0	1	1	1	1	1	1	1	1	1	1	1	1	1	1	1	1	1	1	1	1	1	1	1	1	1
		cell6	16.5222	18.5291	67.5368	92.9525	136.595	305.182	329.945	2.02866	2.73907		cell6	4.03094	15.3811	61.4045	106.807	186.792	214.741	251.954	1.79774	1.27282	1	3.74216	6.37475	3.83852	3.21557	2.24682	3.0116	5.86313	3.29533	2.16865	2.00078	1.44092	3.86485	3.66561	2.69726	4.72993	4.2436	2.9822	4.00059	3.86352	2.61531	3.87591	4.32632	3.67966	2.40103	3.72368
		cell7	20.5912	155.052	222.713	326.993	386.917	617.239	711.517	3.14569	11.0822		cell7	4.34763	24.2553	65.2447	92.6962	158.68	150.65	148.167	4.56948	2.29114	2	2.97396	3.93953	2.6916	2.48526	1.70513	2.07888	3.64505	2.5291	1.79207	1.86262	1.59101	2.1668	2.26524	2.39293	4.06214	2.52378	2.00102	2.41488	2.7034	2.12452	3.28105	2.67245	2.55872	2.10437	2.45557
		cell8	15.6194	35.5131	49.6102	108.532	125.637	123.749	157.576	9.04593	6.2653		cell8	11.9011	50.6686	76.6248	108.094	157.366	207.643	362.622	3.77106	2.20044	3	2.70826	2.53214	2.52085	1.88283	1.40314	1.79957	2.71954	1.80575	1.15495	1.48801	1.68321	1.89687	2.03765	2.02283	3.25091	1.76153	2.02229	2.1013	2.29595	2.13431	2.6508	2.10914	2.51356	2.45207	2.39877
		cell9	12.9918	122.257	179.721	244.754	299.723	452.172	514.5	2.93053	4.05766		cell9	15.6438	70.1653	142.109	205.622	263.247	331.873	350.245	3.48354	2.94747	4	2.61499	1.77234	2.34355	1.4783	1.36371	1.69182	2.43842	1.44273	0.802886	1.6066	1.42475	1.95585	1.5375	1.75792	3.52572	1.59294	1.75143	2.24096	1.69859	2.58642	2.20444	1.90423	2.35174	2.01113	2.50649
		cell10	3.09988	33.6185	51.1846	44.8851	45.9236	72.2533	69.2359	6.95959	5.0396		cell10	2.53081	7.96682	30.9515	66.9471	74.1585	93.3925	113.224	6.30663	4.7753	5	2.41216	1.82989	2.07989	1.59843	1.33416	1.21164	2.21183	1.47799	1.21714	1.85594	1.17598	2.47084	1.54829	1.51442	3.92286	1.18235	1.85405	1.95594	1.46617	2.31451	2.55451	1.4292	1.97956	2.046	2.01524
		cell11	9.48296	10.9701	78.8904	140.481	205.664	344.711	325.902	0.96914	2.64738		cell11	4.04374	18.3989	28.2123	49.5304	57.1672	85.3262	124.952	2.02236	0.881783	6	2.47658	1.80642	1.80092	1.44357	1.55773	1.43637	1.93383	0.947114	0.939023	1.46983	0.784964	2.29962	1.60724	1.44395	3.40374	1.63288	1.50703	2.35365	1.32577	2.34481	2.01966	1.47982	1.60912	2.219	2.13271
		cell12	3.35601	16.5904	71.9543	110.907	173.859	310.725	456.295	5.21873	2.61709		cell12	6.92457	32.7574	78.899	130.163	174.319	242.53	268.256	1.37378	5.14431	7	2.09622	1.85505	1.72843	1.43648	1.33943	1.20517	2.26577	0.998339	0.809489	1.65041	1.09566	2.43015	1.8116	1.49592	3.98237	1.06724	1.58315	2.50069	1.31213	2.62134	2.07594	1.1927	1.6013	2.04131	2.22412
		cell13	3.21781	18.4443	21.8028	72.8925	56.5414	134.373	177.045	4.35323	13.7482		cell13	47.0224	171.318	218.142	244.367	252.577	297.111	299.266	4.32194	0.738464	8	2.08121	1.87149	1.84685	1.29947	1.54678	1.3088	2.35813	1.0383	0.93752	1.58449	1.01957	2.75763	1.75267	1.42559	3.73905	1.48385	1.8762	2.02656	1.46554	2.77077	2.10471	1.16087	1.47863	1.78669	1.93244
		cell14	13.9615	29.5288	89.3266	56.563	110.131	160.35	164.673	1.61095	9.54654		cell14	9.36257	32.2536	51.7804	62.665	118.896	134.586	148.022	4.84158	1.2087	9	1.81639	1.33997	1.963	1.19994	1.55521	1.43704	2.00185	1.42442	1.00237	1.34063	1.50314	2.94574	1.55967	1.47828	4.01104	1.10736	1.58208	2.17124	1.25049	2.42299	1.85465	1.2838	1.73255	1.769	1.79564
		cell15	5.12279	43.9394	42.1428	77.3501	89.7608	104.71	114.075	2.19373	13.7423		Cbln2-/-								2.49479	1.78173	10	2.16859	1.21013	1.60678	1.48897	1.64061	1.20888	2.1778	1.18424	0.664947	1.53986	1.53728	3.15737	1.64171	1.32783	3.91478	1.24726	1.4628	2.36103	1.37801	2.62062	2.26903	1.38597	1.40454	1.89768	1.90775
		cell16	3.83479	81.7073	134.048	139.665	165.946	237.742	249.848	2.02687	8.9398		cell1	6.66123	28.0458	55.9937	98.0643	95.3176	174.7	198.924			11	1.88884	1.1905	1.59317	1.24685	1.51816	1.31387	2.56331	1.18233	0.93848	1.48739	1.39303	3.24097	1.57989	1.20936	3.47406	1.1687	1.52447	2.09335	1.25519	2.56078	2.1881	1.00752	1.35229	1.67035	1.68783
		cell17	23.0991	55.2202	68.8951	92.5802	100.264	151.586	131.086	3.82181	12.7014		cell2	3.84676	19.4524	44.9357	56.5881	86.7186	133.215	135.854			12	2.04179	1.54531	1.57728	1.05307	1.61315	1.24492	1.86318	0.885083	0.774146	1.83168	1.04515	3.49849	1.60227	1.27229	4.22582	1.02481	1.46673	2.17517	1.14986	2.88092	2.50039	1.07465	1.50962	1.65807	2.0144
		cell18	20.2628	34.0254	64.1523	169.056	163.301	269.088	251.263	1.9169			cell3	1.457	21.6578	47.6629	66.6067	96.7776	190.454	232.634			13	2.01155	1.17995	1.68257	1.37294	1.39461	1.20874	1.98676	0.912508	1.1106	2.04987	1.36967	3.68112	1.66247	1.44174	4.56469	1.01057	1.45233	1.80543	0.999165	2.38821	2.23975	1.20505	1.48955	1.87389	2.06003
		cell19	5.40663	36.978	48.3718	60.881	143.719	144.876	176.577	4.21106			cell4	4.33092	25.7001	41.4928	80.6551	101.491	158.12	161.304			14	2.09087	1.38086	1.7306	1.47714	1.56372	1.32425	2.28806	0.559228	0.958901	1.65294	1.14797	3.49651	1.70133	1.73595	4.82609	0.838152	1.2568	2.23845	1.07294	2.6384	2.42611	1.39439	1.47404	1.74436	2.16666
		Cbln2-/-								3.00528			cell5	2.97351	7.10304	19.3524	38.2497	51.0411	85.2829	98.4481			15	1.73874	0.950579	1.87008	1.36511	1.44113	1.37306	2.54695	0.881573	0.994968	1.99952	1.15501	3.86752	1.75246	1.85398	4.68438	1.01201	1.24971	1.85985	0.927464	2.65832	2.7393	1.30751	1.78011	1.89454	2.06108
		cell1	8.61409	28.5327	53.1731	107.202	122.082	168.386	186.201				cell6	7.43205	25.7041	30.464	70.8524	99.415	134.709	138.905			16	2.03889	1.27212	1.83078	1.42421	1.76219	1.50159	2.58197	0.741821	0.812478	2.03277	1.44487	3.8092	1.91775	1.59873	5.14659	0.802958	1.2916	2.35236	1.02065	2.35332	2.38166	1.06721	1.46065	2.03334	1.85612
		cell2	25.2672	84.2457	162.96	257.279	368.105	505.906	620.723				cell7	0.54895	7.9628	29.073	63.7756	82.6644	110.587	140.884			17	2.04953	1.17861	1.82377	1.43344	1.75061	1.48154	2.64456	0.743667	0.825413	2.36366	1.29516	4.13888	1.81274	1.63302	4.7438	0.956246	1.41021	1.88176	1.11537	2.5906	2.53048	1.32108	1.48985	1.8944	1.95982
		cell3	5.70395	42.5827	71.6337	102.851	124.317	92.864	149.832				cell8	8.34871	14.2297	39.9717	85.9211	119.877	168.539	206.335			18	1.68194	1.39831	1.95681	1.15534	1.72897	1.45923	2.19583	0.939162	0.879611	1.9684	1.59089	4.03603	1.82016	1.89633	5.13703	0.967789	1.61895	1.91581	1.17142	2.4767	2.36109	1.33392	1.46075	1.61319	1.86462
		cell4	28.4874	111.162	215.738	285.262	377.012	557.022	650.746				cell9	2.22589	21.0471	87.0426	104.026	199.501	177.064	185.464			19	1.63715	1.12491	1.80876	1.47869	1.73625	1.45479	2.66486	0.59693	0.817423	2.25221	1.19381	3.90664	1.73902	1.4557	5.00642	1.16629	1.31019	2.09882	1.36209	2.13891	2.61213	1.26941	1.45047	1.85688	1.99844
		cell5	4.13958	58.0476	84.5967	81.6321	129.301	189	192.08				cell10	6.27176	15.895	36.3933	39.3595	38.6287	48.0789	55.947			20	2.01309	1.02231	1.98448	1.26719	1.77082	1.35488	2.87813	0.547003	1.02816	2.64631	1.29458	4.20524	1.90015	1.96171	4.77943	0.971787	1.40328	1.68414	1.3982	2.6584	2.73229	1.17136	1.53691	2.07225	2.3009
		cell6	18.5457	183.794	255.544	374.822	477.143	682.85	793.747				cell11	3.18989	12.2403	75.659	145.988	193.531	277.765	277.951			21	1.95519	0.944564	1.97258	1.0535	1.83487	1.21124	2.21494	0.853231	0.724798	2.28415	1.39307	4.10532	1.44155	2.94575	4.98635	1.13323	1.25745	1.85856	1.28909	2.66892	2.21627	1.21932	2.05918	2.04763	2.23954
		cell7	17.7833	68.2763	85.3174	183.433	273.47	381.162	501.219				cell12	6.91985	7.04969	14.6784	24.7603	34.9878	52.6177	72.1551			22	2.16472	1.07239	1.95672	1.39641	1.87212	1.58705	2.53518	0.565193	0.741348	2.16499	1.38181	4.32668	1.51302	2.45309	5.30561	1.07148	1.40369	2.56619	1.30115	2.47561	2.29836	1.24997	1.61246	2.04924	2.15296
		cell8	21.4856	69.4612	130.432	160.284	178.957	220.468	223.882				cell13	8.89253	37.8878	40.1728	43.7666	66.3881	67.105	74.2431			23	2.10599	1.00394	1.87904	1.17226	2.0288	1.34622	2.30886	0.535368	0.956515	2.70356	1.41307	3.90634	1.76695	2.05408	5.04808	1.13212	1.25507	2.47428	1.0754	2.46712	2.47486	1.3509	1.85968	1.93308	2.27499
		cell9	21.1684	166.464	214.562	245.1	233.83	304.759	335.123				cell14	3.53378	19.0923	32.114	51.3644	76.4843	127.646	182.241			24	2.18224	1.00847	1.7258	1.30419	1.97449	1.32901	2.29644	0.716283	0.921278	2.95624	1.25291	4.56632	1.74418	2.03552	5.048	1.26605	1.28462	1.92225	0.814084	2.95394	2.70026	1.05534	1.52654	1.87709	2.26672
		cell10	13.1372	57.7239	93.0288	107.949	120.394	153.222	209.879														25	2.25983	0.857741	1.83298	1.46526	1.91858	1.29527	2.13147	0.918644	0.797778	3.05856	1.20226	4.29736	2.0801	2.337	4.68298	1.06856	1.09045	2.54613	1.0133	2.95558	1.90328	1.27756	1.39504	1.65419	2.39486
		cell11	15.0626	87.4758	63.8088	87.6135	145.848	137.678	124.379														26	2.06919	0.879901	1.79189	1.77293	2.0749	1.35222	2.25955	0.750416	1.05066	2.93019	1.19472	4.11146	1.95895	2.35435	4.36535	1.22483	1.46238	1.96291	1.21864	2.6641	1.8661	1.03609	1.5752	1.83626	2.15337
		cell12	40.8299	111.471	297.219	509.002	529.476	789.301	824.572														27	1.956	0.967014	1.89569	1.41128	2.01051	1.32995	2.35755	0.872517	0.889806	3.16135	1.16531	4.14241	1.82676	2.0212	4.6886	1.02143	1.18929	1.7747	0.790148	2.68022	2.33121	0.966116	1.57777	1.93194	2.33305
		cell13	19.94	197.706	212.781	339.436	426.402	594.596	768.516														28	2.09572	1.02734	1.92218	1.31202	1.79497	1.23987	2.80726	0.778089	0.976206	2.92612	1.04665	4.24324	1.75815	2.46049	4.8696	1.36804	1.47355	1.78381	0.882985	2.70361	2.67751	1.28623	1.41364	1.95579	2.20456
		cell14	5.45876	84.8613	220.206	334.031	567.989	717.623	775.557														29	2.09617	1.06737	1.9154	1.32079	1.85282	1.30147	2.30336	0.802024	0.703461	3.25673	0.947857	4.01013	1.79288	2.22994	4.8452	1.27683	1.42405	1.55995	0.690361	2.4449	2.55901	1.02948	1.62695	1.78138	2.3054
		cell15	5.90972	132.572	120.717	237.472	400.45	512.836	706.29														30	2.16617	1.03549	1.65135	1.45	1.9347	1.11659	2.24687	0.884925	0.694654	2.81082	1.22427	3.97419	1.94281	3.1547	4.59394	1.23472	1.22261	1.97299	0.976083	2.7461	2.64914	1.16026	1.20192	1.74081	2.43478
		cell16	47.5054	191.732	378.577	449.351	553.767	653.172	644.607														31	1.95796	0.893338	1.801	1.33946	2.01906	1.00277	2.37462	0.839439	0.921661	2.95699	0.952081	4.29251	1.90675	2.28416	4.50687	1.48045	1.28114	1.87043	0.988188	2.68839	2.89707	1.15762	1.73425	1.57309	2.51249
																							32	2.07731	0.818926	2.03297	1.42782	1.81019	1.31456	2.2928	0.699874	0.71876	3.40445	1.01259	4.32461	1.91789	2.34862	4.59779	1.30756	1.32751	1.55091	0.884137	2.67007	2.74827	1.23371	1.54019	1.82713	2.62146
																							33	1.86635	0.777827	2.35104	1.21173	1.79152	1.76426	2.43975	0.841661	0.789974	3.14017	1.05272	4.43509	1.94646	3.09413	5.00061	1.16139	1.0441	1.88414	1.04636	2.80758	2.59065	1.17389	1.3881	1.66229	2.54537
																							34	1.52338	0.669379	1.96529	1.20279	1.59968	1.57557	2.76184	0.806651	0.922427	2.95256	0.795457	4.21707	1.87629	2.06174	5.11685	1.39708	1.23072	2.12989	0.632531	2.76662	2.00643	1.11452	1.5822	1.69571	2.56323
																							35	1.85331	0.944841	2.37193	1.48519	2.01273	1.55822	2.15008	0.583646	0.958018	3.15554	0.921451	4.2538	1.96787	2.8305	5.29487	1.0966	1.44841	1.50854	0.937798	2.62356	2.1412	1.14812	1.36779	1.64546	2.62154
																							36	1.84776	1.12402	1.95747	1.29762	1.77036	1.45776	2.77155	0.916422	0.882627	2.33884	0.879067	4.24066	2.23302	2.10706	5.27623	1.50442	1.3238	2.06139	0.76626	2.509	1.98534	0.717702	1.67379	1.60516	2.52907
																							37	2.05252	0.818745	1.70469	1.49435	1.71886	1.4983	2.73874	0.717664	0.676614	2.4805	0.718345	4.56471	0.941705	2.29678	5.25028	1.32218	1.29571	1.77261	0.817212	2.51951	2.21382	1.03267	1.71563	1.57022	2.59079
																							38	1.72312	0.854536	1.99841	1.4366	1.62742	1.19793	2.40346	0.564189	0.841841	2.72279	0.71066	4.23671	1.58092	2.7809	4.78888	1.55855	1.29514	2.0107	0.877871	2.28742	2.34829	0.956651	1.82854	1.78644	2.23919
																							39	1.78751	0.736598	1.9756	1.69885	1.62449	1.44686	2.47161	0.657023	0.813556	2.7588	0.894325	4.05484	1.46309	1.8249	4.78892	1.5348	1.17232	1.58081	0.867307	2.10245	2.18262	1.00888	1.47652	1.63989	2.33044
																							40	1.99827	1.08369	1.84268	1.09593	1.87346	1.50561	2.45811	0.541566	0.640501	2.95819	0.792839	4.0612	1.53465	2.04412	4.22575	1.16242	1.18759	1.83614	0.979228	2.33293	2.11144	1.09113	1.99623	1.7382	2.55484
																							41	2.01019	0.900615	1.98499	1.30464	1.85291	1.51362	2.46713	0.652931	0.882559	2.57115	0.978808	4.15787	1.48781	2.37126	4.30297	1.27113	1.02451	1.54994	1.00324	2.76596	2.06847	1.05122	1.74752	1.83146	2.4323
																							42	1.92441	0.972817	1.97605	1.57219	1.7384	1.35712	2.54616	0.787159	0.861562	2.74735	0.945525	4.09175	1.63079	2.28443	3.79621	1.51395	1.10251	1.50955	1.12633	2.67089	2.17721	1.24658	1.43773	2.06203	2.45628
																							43	1.73346	1.04213	1.90286	1.75193	1.52515	1.41731	2.62849	0.802791	0.882915	2.63339	0.971267	3.78552	1.70267	2.50546	4.38044	1.50062	1.21399	1.88146	1.02864	2.79653	2.092	1.42829	1.72444	1.7876	2.51948
																							44	1.9198	0.959828	2.02966	1.47215	1.78937	1.50898	2.87763	0.726007	0.898671	2.58961	0.882113	3.94103	1.81463	2.22926	4.56639	1.34485	1.3281	1.96435	0.896483	2.42405	1.8948	1.19447	1.90858	1.97766	2.25021
																							45	1.94898	0.787547	1.68982	1.66543	1.70486	1.54613	2.39445	0.602826	0.827814	2.78126	0.883122	4.42992	1.29719	2.113	4.79176	1.57247	0.964241	1.48625	0.752657	2.79183	1.75276	1.08657	1.85401	1.7111	2.40489
																							46	2.06931	0.634053	1.90318	1.48379	1.61521	1.36205	2.69195	0.637019	0.8384	2.64846	1.05698	3.76573	1.09065	2.63543	4.37712	1.38668	0.934717	2.02676	0.997753	2.4295	1.90908	1.26245	1.81503	1.73439	2.50373
																							47	1.85613	0.759924	2.01399	1.51259	1.61268	1.78558	2.45111	0.431404	0.847936	2.66277	0.880024	4.26597	1.30561	2.08145	3.69407	1.38632	1.07758	2.12202	0.883597	2.79065	1.8623	1.19528	1.81808	1.77524	2.31449
																							48	1.86276	0.739289	2.04857	1.44165	1.56786	1.4197	2.67628	0.528537	0.830773	2.57536	1.00517	4.01728	1.12453	1.98148	4.23001	1.51323	0.997691	1.43066	0.811225	2.84602	1.90289	0.997763	1.7747	1.81257	2.54652
																							49	1.93052	0.95312	2.32002	1.30534	1.67713	1.72788	2.5292	0.724914	0.747852	2.63939	1.08279	4.30055	1.14971	2.53729	4.2957	1.31511	1.1743	1.80794	0.836614	2.67697	1.83987	1.14193	1.71466	1.6684	2.06339
																							50	1.50316	0.87778	2.18637	1.41968	1.76093	1.49722	2.72146	0.800074	0.715593	2.5164	0.891323	3.9656	1.30553	2.33627	3.84767	1.34389	1.3782	1.5082	0.859631	3.17525	2.04806	1.20585	1.72213	1.91691	2.43205
																							51	1.7403	0.802211	2.29768	1.40336	1.65337	1.37931	2.42025	0.62603	0.834378	2.95199	0.836004	3.95869	1.17833	1.98784	4.45742	1.39793	1.07707	1.64618	0.85686	2.66117	1.59475	1.0833	1.71916	1.68601	2.43309
																							52	1.63178	0.606772	1.99763	1.58879	1.4986	1.56671	2.42251	0.660911	0.913442	3.01212	0.897621	4.05238	1.58257	1.95525	4.60571	1.57741	1.15299	1.63694	0.68947	2.4561	1.83924	1.00168	1.41862	1.59498	2.44966
																							53	1.45722	0.828998	2.46933	1.43605	1.7761	1.27166	2.35115	0.753303	0.865905	3.06355	0.789257	3.63617	1.48615	2.09616	4.3543	1.60732	1.30516	1.3152	0.734223	2.3799	1.97398	1.23492	1.83436	1.75321	2.19599
																							54	1.33936	0.873166	2.15298	1.626	1.55172	1.21444	2.47306	0.717792	0.880273	3.13893	0.869524	4.10513	1.61955	2.16157	4.81839	1.66314	1.31791	1.78622	0.867217	2.47263	1.95667	1.30538	1.89456	1.61244	2.46943
																							55	1.46435	0.647877	2.21831	1.55433	1.5371	1.09964	2.27826	0.781067	1.11212	3.1595	0.802633	3.98502	1.73143	2.14533	4.79648	1.42763	1.19412	1.64001	0.524307	2.36184	1.81282	1.05127	1.696	1.5956	2.1763
																							56	1.47014	0.729374	2.04355	1.5049	1.55937	1.43545	2.42181	0.571888	1.25547	3.23576	0.853041	3.65888	1.62587	2.14361	3.89463	1.59978	1.41951	1.17283	0.872225	2.69187	1.5713	1.33111	1.79384	1.63352	2.45135
																							57	1.42722	0.571982	2.01816	1.40803	1.55779	1.12783	2.3911	0.627165	1.03732	3.31037	1.07089	3.76752	1.81631	2.18618	4.17643	1.56589	1.27347	1.31221	0.98083	2.56396	1.55498	1.5051	2.00964	1.7667	2.21687
																							58	1.60292	0.837627	2.06742	1.33788	1.53151	1.34949	2.38577	0.62662	1.04354	2.72145	0.898065	3.98667	1.74235	2.29408	4.7513	1.52337	1.13465	1.53627	0.650064	2.5168	1.58735	1.47158	1.79902	1.4941	2.21599
																							59	1.54102	0.803235	2.34336	1.37164	1.77898	1.64668	2.52912	0.691317	0.978843	2.38113	0.821268	3.95656	1.7003	2.0934	4.22658	1.46483	1.18039	1.60797	0.848179	2.38268	1.88685	1.49456	1.63667	1.7138	2.32838
																							60	1.38327	0.697548	2.81092	1.52872	1.67231	1.43155	2.52825	0.605398	0.706918	2.87355	0.843208	3.79339	1.71801	2.19412	4.41596	1.68485	1.24384	1.62404	0.757376	2.65005	1.65736	1.33351	2.01009	1.65495	2.30689
[truncated: 53 more columns]

## Sheet: Sheet2
15.4741	10.7772	2.39943	29.4545	3.66535	16.5222	20.5912	15.6194	12.9918	3.09988	9.48296	3.35601	3.21781	13.9615	5.12279	3.83479	23.0991	20.2628	5.40663
173.477	33.4183	10.9061	80.2588	32.6098	18.5291	155.052	35.5131	122.257	33.6185	10.9701	16.5904	18.4443	29.5288	43.9394	81.7073	55.2202	34.0254	36.978
260.195	46.4845	49.478	127.093	68.2066	67.5368	222.713	49.6102	179.721	51.1846	78.8904	71.9543	21.8028	89.3266	42.1428	134.048	68.8951	64.1523	48.3718
434.968	100.134	36.5235	174.749	87.156	92.9525	326.993	108.532	244.754	44.8851	140.481	110.907	72.8925	56.563	77.3501	139.665	92.5802	169.056	60.881
400.524	78.0394	47.7595	196.224	77.8254	136.595	386.917	125.637	299.723	45.9236	205.664	173.859	56.5414	110.131	89.7608	165.946	100.264	163.301	143.719
528.279	88.0783	48.2752	220.547	118.184	305.182	617.239	123.749	452.172	72.2533	344.711	310.725	134.373	160.35	104.71	237.742	151.586	269.088	144.876
685.629	99.1034	85.3322	263.166	110.948	329.945	711.517	157.576	514.5	69.2359	325.902	456.295	177.045	164.673	114.075	249.848	131.086	251.263	176.577
15.474	wt	8.614	ko
173.477	wt	25.267	ko
260.195	wt	5.704	ko
434.968	wt	28.487	ko
400.524	wt	4.14	ko
528.279	wt	18.546	ko
685.629	wt	17.783	ko
10.777	wt	21.486	ko
33.418	wt	21.168	ko
46.485	wt	13.137	ko
100.134	wt	15.063	ko
78.039	wt	40.83	ko
88.078	wt	19.94	ko
99.103	wt	5.459	ko
2.399	wt	5.91	ko
10.906	wt	47.505	ko
49.478	wt	28.533	ko
36.524	wt	84.246	ko
47.76	wt	42.583	ko
48.275	wt	111.162	ko
85.332	wt	58.048	ko
29.455	wt	183.794	ko
80.259	wt	68.276	ko
127.093	wt	69.461	ko
174.749	wt	166.464	ko
196.224	wt	57.724	ko
220.547	wt	87.476	ko
263.166	wt	111.471	ko
3.665	wt	197.706	ko
32.61	wt	84.861	ko
68.207	wt	132.572	ko
87.156	wt	191.732	ko
77.825	wt	53.173	ko
118.184	wt	162.96	ko
110.948	wt	71.634	ko
16.522	wt	215.738	ko
18.529	wt	84.597	ko
67.537	wt	255.544	ko
92.953	wt	85.317	ko
136.595	wt	130.432	ko
305.182	wt	214.562	ko
329.945	wt	93.029	ko
20.591	wt	63.809	ko
155.052	wt	297.219	ko
222.713	wt	212.781	ko
326.993	wt	220.206	ko
386.917	wt	120.717	ko
617.239	wt	378.577	ko
711.517	wt	107.202	ko
15.619	wt	257.279	ko
35.513	wt	102.851	ko
49.61	wt	285.262	ko
108.532	wt	81.632	ko
125.637	wt	374.822	ko
123.749	wt	183.433	ko
157.576	wt	160.284	ko
12.992	wt	245.1	ko
122.257	wt	107.949	ko
179.721	wt	87.614	ko
244.754	wt	509.002	ko
299.723	wt	339.436	ko
452.172	wt	334.031	ko
514.5	wt	237.472	ko
3.1	wt	449.351	ko
33.619	wt	122.082	ko
51.185	wt	368.105	ko
44.885	wt	124.317	ko
45.924	wt	377.012	ko
72.253	wt	129.301	ko
69.236	wt	477.143	ko
9.483	wt	273.47	ko
10.97	wt	178.957	ko
78.89	wt	233.83	ko
140.481	wt	120.394	ko
205.664	wt	145.848	ko
344.711	wt	529.476	ko
325.902	wt	426.402	ko
3.356	wt	567.989	ko
16.59	wt	400.45	ko
71.954	wt	553.767	ko
110.907	wt	168.386	ko
173.859	wt	505.906	ko
310.725	wt	92.864	ko
456.295	wt	557.022	ko
3.218	wt	189	ko
18.444	wt	682.85	ko
21.803	wt	381.162	ko
72.893	wt	220.468	ko
56.541	wt	304.759	ko
134.373	wt	153.222	ko
177.045	wt	137.678	ko
13.962	wt	789.301	ko
29.529	wt	594.596	ko
89.327	wt	717.623	ko
56.563	wt	512.836	ko
110.131	wt	653.172	ko
160.35	wt	186.201	ko
164.673	wt	620.723	ko
5.123	wt	149.832	ko
43.939	wt	650.746	ko
42.143	wt	192.08	ko
77.35	wt	793.747	ko
89.761	wt	501.219	ko
104.71	wt	223.882	ko
114.075	wt	335.123	ko
3.835	wt	209.879	ko
81.707	wt	124.379	ko
134.048	wt	824.572	ko
139.665	wt	768.516	ko
165.946	wt	775.557	ko
237.742	wt	706.29	ko
249.848	wt	644.607	ko
23.099	wt
55.22	wt
68.895	wt
92.58	wt
100.264	wt
151.586	wt
131.086	wt
20.263	wt
34.025	wt
64.152	wt
169.056	wt
163.301	wt
269.088	wt
251.263	wt
5.407	wt
36.978	wt
48.372	wt
60.881	wt
143.719	wt
144.876	wt
176.577	wt
