# Supplementary material for: Distinct neurexin-cerebellin complexes control AMPA- and NMDA-receptor responses in a circuit-dependent manner
Source: eLife. 2022 Oct 7;11:e78649. doi: 10.7554/eLife.78649 (PMC9586558; doi:10.7554/eLife.78649)
Supplement: Figure 2—source data 1. [file elife-78649-fig2-data1.xlsx]

## Sheet: Sheet1
	Figure2C		Latency (s)													# of Entries		Figure2D		Activity													Activity		Figure2E-G	Entry Latency				# of Entries				Activity
one-tailed unpaired t-test p-values		Cbln2+/+	mouse1	mouse2	mouse3	mouse4	mouse5	mouse6	mouse7	mouse8	mouse9	mouse10	mouse11			p = 0.01624			Cbln2+/+	mouse1	mouse2	mouse3	mouse4	mouse5	mouse6	mouse7	mouse8	mouse9	mouse10	mouse11			p = 0.02711			1 day		7 days		1 day		7 days		1 day		7 days
for all panels			8.56	10.42	6.88	40.11	16.59	12.53	81.74	23.03	29.97	5.61	7.05			Cbln2+/+	Cbln2-/-			1.0514	0.767754	1.01744	0.398903	0.361664	1.11732	0.415953	0.781589	0.333667	1.78253	0.992908			Cbln2+/+	Cbln2-/-		p = 0.00901		p = 0.00621		p = 0.00716		p = 0.02144		p = 0.01211		p = 0.03555
			105.2	61.43	73.33	22.23	54.67	14.53	46.37	21.72	112.68	68.07	14.6			3	8			0.294677	0.179066	0.681849	0.449843	0.438998	1.03235	0.841061	1.10497	0.15087	0.38196	1.78082			0.1167	0.9833		Cbln2+/+	Cbln2-/-	Cbln2+/+	Cbln2-/-	Cbln2+/+	Cbln2-/-	Cbln2+/+	Cbln2-/-	Cbln2+/+	Cbln2-/-	Cbln2+/+	Cbln2-/-
			120	89.75	33.94	120	120	39.77	62.76	109.52	120	120	105.72			5	14			0.116667	0.211699	0.766058	0.341667	0.325	0.553181	0.302741	0.493061	0.0916667	0.141667	0.964813			0.1833	0.3667		120	1.26	120	75.69	0	2	0	1	0.05	1.49523	0.0416667	0.635744
				81.95	120			120	120	120			64.21			4	6				0.195241	0.0916667			0.375	0.241667	0.208333			1.0123			0.0917	0.3333		120	2.17	120	2.77	0	5	0	5	0.05	1.42766	0.05	1.81161
				120									120			3	3				0.183333									0.433333			0.3417	0.0667		120	120	120	32.99	0	0	0	4	0.275	0.225	0.466667	0.865036
																3	6																0.325	0.2833		120	120	120	120	0	0	0	0	0.133333	0.108333	0.15	0.025
		Cbln2-/-	mouse1	mouse2	mouse3	mouse4	mouse5	mouse6	mouse7	mouse8	mouse9	mouse10	mouse11	mouse12	mouse13	4	5		Cbln2-/-	mouse1	mouse2	mouse3	mouse4	mouse5	mouse6	mouse7	mouse8	mouse9	mouse10	mouse11	mouse12	mouse13	0.375	0.2		120	120	96.47	120	0	0	2	0	0.0416667	0.15	1.306	0.141667
			4.52	7.25	26.35	35.28	17.15	14.15	7.04	56.08	14.67	13.55	4.81	10.63	3.46	4	5			1.10619	1.37931	0.948767	0.255102	0.874636	0.636042	0.994318	0.552782	0.817996	0.369004	1.2474	0.752587	3.46821	0.2417	0.2167		49.5	103.34	23.05	120	2	1	3	0	0.745776	0.24192	0.737645	0.541667
			4.7	4.26	51.9	63.28	6.43	7.67	12.92	4.77	29.27	39.34	10.9	10.11	11.5	4	3			3.40426	1.64319	0.404624	0.458281	1.71073	0.782269	0.851393	1.04822	1.12743	0.381291	1.83486	1.58259	1.13043	0.2083	0.4333		120	85.49	96.03	13.07	0	1	1	3	0.241667	0.365206	0.452957	0.551007
			3.33	5.27	6.79	120	3.37	83.34	47.25	120	15.43	19.34	90.94	14.07	23.65	3	6			1.8018	1.13852	1.62003	0.0666667	1.48368	0.443964	0.232804	0.433333	1.42579	0.206825	0.571806	0.781805	1.22622	0.0917	0.4		120	12.47	75.03	42.74	0	5	1	2	0.408333	1.15421	0.398984	1.3999
			10.72	2.94	86.65		84.38	20.77	83.13		8.85	38.81	120	22.93	99.41	2	5			0.652985	1.36054	0.450087		0.450344	0.240732	0.216528		0.79096	0.360732	0.341667	0.654165	0.643798	0.1417	0.3607		120	4.66	120	22.33	0	4	0	2	0.141667	1.6488	0.0333333	1.02198
			43.07	10.04	22.75		52.65	120	120		74.31	120		58.3	120	4	3			0.603668	0.996016	0.0879121		0.265907	0.2	0.216667		0.322971			0.205832	0.533333	0.4333	0.3417		120	120	120	58.29	0	0	0	2	0.4	0.225	0.233333	0.380319
			102.62	25.44	120		120				120			120			5			0.185149	0.471698	0.333333		0.283333				0.4			0.441667			0.4417		73.1	28.52	71.93	9.36	1	2	2	3	0.569586	0.402201	0.809982	0.62746
			22.47	32.24													4			0.400534	0.961538													0.5333			100.54		67.31		1		2		0.781487		1.52908
			120	19.63																0.983333	1.47733																41.1		47.53		3		2		1.44121		0.788273
				76.94																	0.4549
				31.27																	0.831468
				21.35																	1.35831
				63.45																	0.630418
				57.5																	0.521739
				120																	0.366667
