# Supplementary material for: Distinct neurexin-cerebellin complexes control AMPA- and NMDA-receptor responses in a circuit-dependent manner
Source: eLife. 2022 Oct 7;11:e78649. doi: 10.7554/eLife.78649 (PMC9586558; doi:10.7554/eLife.78649)
Supplement: Figure 3—source data 1. [file elife-78649-fig3-data1.xlsx]

## Sheet: Sheet1
	Figure3C	Cbln2+/+	Cbln2-/-	Figure3E	Cbln2+/+								Cbln2-/-
two-tailed unpaired t-test p-values		p = 0.14721		Protein level	NL1	PSD95	Synapsin	Nrxns	Syt-1	vGluT1	CASK	GAD65	NL1	PSD95	Synapsin	Nrxns	Syt-1	vGluT1	CASK	GAD65
for all panels		vGluT1 Intensity (A.U.)											p = 0.35447	p = 0.24114	p = 0.58638	p = 0.99981	p = 0.29245	p = 0.90319	p = 0.63258	p = 0.15232
		3.2172	3.8439		1.2137	0.8257	0.9409	1.0138	1.1369	1.5524	1.2977	1.1459	1.2263	1.0314	1.2671	0.8369	1.1411	1.3101	0.8901	0.8191
		3.0497	3.1416		0.8954	0.9827	0.6362	1.0138	0.7603	0.9322	1.2755	0.8468	1.0611	0.9748	0.9551	0.8981	1.0215	0.7863	0.8313	0.7715
		4.0858	2.8474		0.9489	1.0872	1.1858	1.0423	1.0627	0.6952	0.7539	1.0625	1.0521	1.1929	1.1628	1.2729	1.0464	0.9819	1.1669	0.7345
		3.2374	3.0087		0.942	1.1044	1.2371	0.9302	1.04	0.8201	0.6729	0.9447	1.0082	1.377	0.9752	0.9921	1.2314	1.0327	1.5976	1.046
		3.7156	2.8456
		3.3714	2.9778
		2.9179	3.7286
		2.9798	2.9907
		2.7647	3.4184
		2.8495	3.7017
		2.5556	3.4743
		2.688	3.9777
		2.5735	3.9795
		2.4859	4.4253
		4.9437	4.2648
		4.3359	3.4114
			3.1327
			5.2029
