# Supplementary material for: Distinct neurexin-cerebellin complexes control AMPA- and NMDA-receptor responses in a circuit-dependent manner
Source: eLife. 2022 Oct 7;11:e78649. doi: 10.7554/eLife.78649 (PMC9586558; doi:10.7554/eLife.78649)
Supplement: Figure 4—figure supplement 1—source data 1. [file elife-78649-fig4-figsupp1-data1.xlsx]

## Sheet: Sheet1
Figure 4-figure supplement 1B	Cerebellum			Prefrontal Cortex			Subiculum			CA1
	Nrxn1 SS4 insert %	Nrxn2 SS4 insert %	Nrxn3 SS4 insert %	Nrxn1 SS4 insert %	Nrxn2 SS4 insert %	Nrxn3 SS4 insert %	Nrxn1 SS4 insert %	Nrxn2 SS4 insert %	Nrxn3 SS4 insert %	Nrxn1 SS4 insert %	Nrxn2 SS4 insert %	Nrxn3 SS4 insert %
	0.849901	0.814511	1	0.316057	0.320194	0.435972	0.422254	0.362469	0.567972	0.420348	0.343964	0.53461
	0.838884	0.81496	1	0.330982	0.325345	0.463607	0.409417	0.404524	0.622197	0.406752	0.305013	0.512291
	0.820658	0.836386	1	0.31949	0.320246	0.435245	0.405028	0.347037	0.56581	0.426624	0.323427	0.497408
