# Supplementary material for: Distinct neurexin-cerebellin complexes control AMPA- and NMDA-receptor responses in a circuit-dependent manner
Source: eLife. 2022 Oct 7;11:e78649. doi: 10.7554/eLife.78649 (PMC9586558; doi:10.7554/eLife.78649)
Supplement: Figure 4—source data 1. [file elife-78649-fig4-data1.xlsx]

## Sheet: Sheet1
	Figure4B		Stimulation Itensity (mA)							Slope			Figure4C		Stimulation Itensity (mA)							Slope			Figure4D		Interstimulus interval (ms)					Figure4E		Interstimulus interval (ms)					Figure4G		Stimulation Itensity (mA)							Slope
two-tailed unpaired t-test p-values	AMPAR EPSCs	Cbln2+/+ + Nrxn3SS4+	10	20	30	40	50	75	100	Cbln2+/+ + Nrxn3SS4+	Cbln2-/- + Nrxn3SS4+	Cbln2-/- + Nrxn3SS4-	NMDAR EPSCs	Cbln2+/+ + Nrxn1SS4+	10	20	30	40	50	75	100	Cbln2+/+ + Nrxn1SS4+	Cbln2-/- + Nrxn1SS4+	Cbln2-/- + Nrxn1SS4-		Cbln2+/+ + Nrxn3SS4+	20	80	200	800	2000		Cbln2+/+ + Nrxn1SS4+	20	80	200	800	2000	AMPAR EPSCs	Cbln2+/+	10	20	30	40	50	75	100	Cbln2+/+	Cbln2-/-
with comparing to control for all panels	Cbln2-/- + Nrxn3SS4+ to Cbln2+/+ + Nrxn3SS4+ : p < 0.0001	cell1	14.2538	37.4552	29.1396	62.84	74.2016	102.652	100.356	Control	p = 0.00034	p = 0.00048	Cbln2-/- + Nrxn1SS4+ to Cbln2+/+ + Nrxn1SS4+ : p < 0.0001	cell1	7.37777	79.1394	166.02	222.158	239.86	292.646	363.5	Control	p = 0.00002	p = 0.00029		cell1	1.1455	1.46948	1.19355	1.0524	0.899707		cell1	1.39956	1.34619	1.08233	0.895694	0.95572	Cbln2-/- to Cbln2+/+ : p < 0.0001	cell1	29.0428	30.0929	40.2717	52.1477	66.8326	101.901	98.5725	Control	p = 0.00044
except input/output curves and PPR using two-way ANOVA	Cbln2-/- + Nrxn3SS4- to Cbln2+/+ + Nrxn3SS4+ : p < 0.0001	cell2	2.2417	35.5945	56.335	77.0757	71.15	86.2716	141.354	1.4528	4.1046	3.97236	Cbln2-/- + Nrxn1SS4- to Cbln2+/+ + Nrxn1SS4+ : p < 0.0001	cell2	11.6682	82.5442	185.429	240.177	307.883	403.451	413.281	6.07983	2.31462	1.08963		cell2	1.81008	1.15511	1.08414	1.18643	1.33104		cell2	1.60105	1.62838	1.06156	0.91065	0.986008	Cbln2-/- + Nrxn3 bSS4+ to Cbln2+/+ : p = 0.0060	cell2	28.6767	42.5796	63.0686	46.2921	104.717	110.442	143.8	0.976345	3.05605
		cell3	4.60966	33.0857	47.4833	87.248	90.8406	134.177	159.986	1.79298	1.17718	1.16935		cell3	9.06703	60.4356	81.41	137.944	181.841	192.872	217.304	7.50063	2.35006	2.68174		cell3	1.44472	1.55602	0.86693	1.03674	0.907218		cell3	1.77469	1.56616	1.10308	0.904313	0.960094	Cbln2-/- + Nrxn3 bSS4- to Cbln2+/+ : p < 0.0001	cell3	5.96239	42.62	54.4829	62.0528	69.9746	94.3767	134.823	1.55793	3.22821
		cell4	4.74148	61.2497	103.995	115.925	143.434	196.528	197.218	2.26624	2.48909	3.60412		cell4	12.2198	109.162	200.112	275.06	305.319	382.848	486.51	4.23057	1.74014	3.32397		cell4	1.66225	1.58154	1.21932	1.23282	0.786463		cell4	1.61766	1.34694	1.19326	0.972384	0.895368		cell4	15.4741	173.477	260.195	434.968	400.524	528.279	685.629	1.47457	1.67078
		cell5	3.87584	12.8117	7.45137	10.7847	34.9532	60.8371	75.165	3.3206	5.59178	4.97096		cell5	13.1865	80.8575	117.255	223.906	412.945	612.684	764.142	7.52097	2.7342	1.07411		cell5	0.775947	0.754357	0.731363	0.773866	0.758989		cell5	1.3608	1.31791	0.944569	0.934881	0.916107		cell5	15.2773	132.886	143.825	220.966	230.084	241.303	224.337	10.3159	8.58708
		cell6	1.9349	33.0412	56.8347	44.7273	68.3277	95.2445	144.217	0.601278	6.39914	2.05082		cell6	45.0004	204.846	336.123	427.089	482.067	546.803	562.665	9.42565	1.10051	1.43815		cell6	1.39212	1.24118	1.04264	0.742864	0.680099		cell6	1.04618	0.839522	0.824769	0.851987	0.930268		cell6	10.7772	33.4183	46.4845	100.134	78.0394	88.0783	99.1034	5.17692	4.15473
		cell7	6.63664	60.3805	156.225	306.888	365.044	542.152	634.183	1.44472	0.668741	1.52612		cell7	13.0634	76.2578	117.614	158.379	210.82	264.313	274.165	10.9638	2.52429	2.46102		cell7	1.75444	1.58911	1.2693	0.843794	0.8401		cell7	1.15314	1.32899	1.1293	0.911499	0.872526		cell7	4.65496	25.1977	17.0569	33.2819	37.7397	40.4299	28.2307	2.0124	4.0059
		cell8	1.67912	67.649	76.014	90.2417	119.86	175.791	216.019	9.63323	3.14669	2.28483		cell8	7.84778	220.654	280.546	237.458	231.791	319.98	278.706	4.77635	1.1269	2.01859		cell8	1.63606	1.4198	1.05008	0.820943	1.12578		cell8	1.55516	1.41906	1.09305	1.06844	0.992153		cell8	2.39943	10.9061	49.478	36.5235	47.7595	48.2752	85.3322	0.742538	3.48987
		cell9	5.20436	18.9134	39.9298	26.0991	80.606	71.1214	65.5603	2.58955	1.2255	7.30373		cell9	6.87855	43.3488	106.768	121.522	147.59	215.51	269.29	4.6469	3.37765	2.08323		cell9	1.82859	1.03247	1.1068	1.11536	0.948118		cell9	1.43787	1.26056	1.12011	0.939309	0.962524		cell9	29.4545	80.2588	127.093	174.749	196.224	220.547	263.166	1.16337	2.97494
		cell10	8.68439	21.9766	37.722	59.2731	62.0761	88.1367	83.3841	1.57989	7.48798	5.25795		cell10	7.70145	34.2243	91.7255	125.889	175.753	239.588	277.053	3.59595	2.08934	1.61309		cell10	1.32217	1.4503	1.3482	0.907637	0.818273		cell10	1.5985	1.12667	1.05684	0.856419	0.894115		cell10	3.66535	32.6098	68.2066	87.156	77.8254	118.184	110.948	4.28029	2.61841
		cell11	12.0158	23.0993	13.9787	47.9365	65.562	95.0676	97.6547	1.4408	9.25431	5.24745		cell11	13.2878	41.4859	64.7024	91.8281	115.394	157.638	185.61	4.27768	4.22231	7.19666		cell11	1.83717	1.31777	1.32674	1.47406	1.01072		cell11	1.89912	1.10141	0.905306	0.925833	0.928289		cell11	6.98546	20.7585	57.3823	45.4245	57.0261	129.786	110.643	2.02866	8.71149
		cell12	4.02575	47.7651	188.259	181.812	255.767	240.315	244.223	1.3193	4.90112	4.34236		cell12	19.5742	95.1279	142.736	217.666	244.598	328.104	367.186	2.54556	3.9515	2.30174		cell12	1.50251	1.58982	0.9957	1.22884	0.947057		cell12	0.930054	0.935534	0.794504	0.869204	1.006		cell12	16.5222	18.5291	67.5368	92.9525	136.595	305.182	329.945	1.24747	3.24288
		cell13	13.397	44.3062	96.3737	61.4705	108.667	79.6876	161.259	6.3753	4.72723	3.5467		cell13	10.6101	114.17	204.529	310.345	286.961	273.312	266.678	5.72586	4.48191	2.58514		cell13	1.66109	1.13697	1.48051	1.08918	0.958153		cell13	1.43681	1.30556	1.19791	0.928896	1.03537		cell13	20.5912	155.052	222.713	326.993	386.917	617.239	711.517	3.14569	3.57882
		cell14	24.0626	70.202	80.6224	104.907	71.4458	155.481	157.122	2.07704	7.25849	8.97927		cell14	11.9443	99.5726	91.7484	178.336	216.115	281.535	314.298	7.48876	3.31873	2.05809		cell14	1.95603	0.5729	1.3801	0.886496	1.54709		cell14	1.36796	1.60263	1.00735	0.894829	0.848893		cell14	16.0685	30.516	81.3419	98.806	116.54	128.361	133.315	9.04593	3.77287
		cell15	11.9216	19.9602	22.9	16.852	25.9321	31.8067	37.2513	1.29471	7.21468	5.286		cell15	9.87094	38.2609	48.2505	76.5515	89.3736	149.281	169.589	4.87105	3.80671	5.28685		cell15	1.73816	0.746913	1.41039	0.866963	0.912035		cell15	1.37204	1.24136	0.962455	0.902679	0.85077		cell15	13.8823	39.1003	83.1402	44.0432	69.9334	55.682	85.6033	2.69233	2.73907
		cell16	18.3528	13.8596	15.2446	20.1127	19.2392	30.8369	36.2546	0.249128	9.23565	5.96182		cell16	6.32983	66.494	154.405	210.399	225.951	321.509	331.581	1.97296	9.48958	2.03483		cell16	1.1418	2.07535	0.632402	1.45618	0.828803		cell16	1.23217	1.34043	1.00179	0.802192	1.00242		cell16	15.6194	35.5131	49.6102	108.532	125.637	123.749	157.576	1.17045	11.0822
		cell17	12.5378	11.9521	19.0176	20.1959	28.5259	36.7003	62.9302	0.0802596	8.73054	2.04685		cell17	6.24734	21.8514	46.0898	65.0211	108.823	204.476	228.606	5.83148	2.91536	3.27961		cell17	1.68663	1.11569	1.30552	1.25017	1.02147		cell17	1.58092	1.24789	1.13055	0.996079	0.93249		cell17	14.5496	57.7474	137.477	173.909	155.318	188.906	228.16	2.93053	6.2653
		cell18	30.0576	66.0429	55.2591	95.1363	86.2628	106.118	153.014	0.402201		3.38249		cell18	8.35654	49.6738	102.604	164.343	237.364	393.621	425.946	2.48321	2.65454	4.65549		cell18	1.9114	1.60189	1.05339	1.259	0.954297		cell18	1.29316	0.98725	1.0043	0.764726	0.942977		cell18	8.55485	21.2233	47.5497	67.403	68.5377	61.823	102.845	3.97699	4.05766
		cell19	15.1243	19.7966	27.4338	36.6084	45.5033	60.6147	45.4873	1.41504		3.84864		cell19	7.84145	66.7316	142.214	193.399	200.496	293.821	340.189	5.72684	5.13534	4.42772		cell19	2.36344	1.44187	1.08015	0.774671	0.820204		cell19	1.1377	1.12288	1.05973	0.902919	0.943158		cell19	3.9163	9.7811	53.6796	60.1255	50.761	76.5336	95.404	1.66145	5.0396
		cell20	12.6632	9.42491	28.2393	21.4625	32.4493	31.8207	33.7174	0.775698		2.945		cell20	5.42882	47.614	91.5797	206.135	251.217	373.329	424.961	5.11977	3.14073	4.59092		cell20	2.35521	1.18793	1.18355	0.966909	0.902396		cell20	1.13704	1.0372	0.819119	0.928468	0.927853		cell20	12.9918	122.257	179.721	244.754	299.723	452.172	514.5	1.44034	3.83822
		cell21	15.4474	35.1632	47.9833	57.9514	95.5351	125.938	100.57	0.516097		2.01506		cell21	7.74314	41.8128	84.4443	141.544	197.567	328.397	478.493	6.50097	2.04519	4.81288		Cbln2-/- + Nrxn3SS4+							cell21	0.998134	0.935487	0.993678	0.886284	1.01258		cell21	52.3207	142.08	197.394	188.421	210.69	292.886	342.375	6.95959	2.64738
		cell22	14.7901	35.6235	75.3601	93.9434	46.8318	118.9	92.7863	1.82964		1.67927		cell22	5.26634	35.9177	98.8681	175.802	256.494	387.245	466.893	4.79378	3.13025	2.6655		cell1	1.71593	1.39328	1.0288	1.06417	0.884905		cell22	1.12737	0.969009	1.07878	0.802857	1.14605		cell22	20.3044	109.113	138.892	183.121	163.384	184.431	218.671	3.6308	4.99534
		Cbln2-/- + Nrxn3SS4+								1.22403		6.67374		cell23	8.54056	45.6136	153.219	259.071	337.111	511.98	623.378	6.4234	2.9626	4.87719		cell2	1.26825	1.11127	1.19432	1.00296	0.792917		Cbln2-/- + Nrxn1SS4+							cell23	3.09988	33.6185	51.1846	44.8851	45.9236	72.2533	69.2359	3.60166	2.61709
		cell1	16.4189	58.8725	109.428	155.959	173.105	246.239	278.619			7.10422		cell24	7.37416	24.4023	58.8843	141.737	250.449	367.527	452.047	8.70598	2.62263	9.7241		cell3	1.85688	1.40637	1.09751	0.894693	1.08781		cell1	1.44497	1.16755	1.16849	1.01148	1.0093		cell24	15.5302	39.5473	53.793	73.9901	85.2762	146.459	121.362	0.96914	3.7619
		cell2	7.58372	12.1903	20.9021	30.2839	57.396	74.5253	80.6721			3.93117		cell25	4.30744	37.3148	74.1784	147.856	237.263	352.148	405.995	6.03485	1.90356	5.41164		cell4	1.10622	1.34637	1.30534	1.03599	1.05571		cell2	1.6412	1.43531	1.07471	1.05681	0.953609		cell25	5.00452	33.5009	83.5653	136.297	126.206	208.854	372.526	1.73935	3.09465
		cell3	3.61493	47.4566	42.8091	105.262	99.1669	116.707	145.391			11.2234		Cbln2-/- + Nrxn1SS4+								5.76452	4.69013	4.39916		cell5	1.20483	1.25675	0.915895	0.882572	1.01397		cell3	1.42832	1.28389	1.01965	0.806244	1.0406		cell26	9.48296	10.9701	78.8904	140.481	205.664	344.711	325.902	3.45199	3.77002
		cell4	24.1725	107.581	165.287	260.224	227.44	365.841	495.78			7.98974		cell1	3.95201	22.3865	50.2365	73.6834	94.0344	113.777	124.552		4.17163	1.53913		cell6	2.04836	1.21754	0.972471	0.821708	0.923682		cell4	1.77078	1.38627	1.20544	0.9854	1.03131		cell27	1.82585	12.5692	31.9356	33.9087	75.9914	83.2052	94.4911	5.21873	13.7482
		cell5	10.6004	31.976	157.702	196.196	248.447	292.153	360.915					cell2	11.0006	49.0482	64.9273	95.9334	105.061	141.633	147.773					cell7	1.80348	1.43421	1.13209	0.990066	1.2288		cell5	1.69129	1.41849	1.21212	0.799157	0.87758		cell28	3.35601	16.5904	71.9543	110.907	173.859	310.725	456.295	1.69671	9.54654
		cell6	15.4607	14.2293	23.1794	42.8023	34.6113	47.8574	47.7442					cell3	3.62499	17.7797	35.2309	61.8488	68.5972	78.8579	96.9132					cell8	2.09257	1.43481	1.05961	0.926458	0.881903		cell6	1.43847	1.5967	0.952898	0.948881	0.962588		cell29	3.21781	18.4443	21.8028	72.8925	56.5414	134.373	177.045	4.35323	13.7423
		cell7	9.42238	43.2206	66.3022	119.405	128.665	165.149	189.663					cell4	18.8097	107.44	108.37	112.137	153.171	184.992	193.957					cell9	1.39357	1.36339	0.930955	1.22291	0.868435		cell7	2.12671	1.69146	1.35399	0.985677	0.904238		cell30	13.9615	29.5288	89.3266	56.563	110.131	160.35	164.673	1.61095	3.18606
		cell8	11.3243	22.8469	51.3554	52.5047	57.7702	90.6914	97.1971					cell5	12.7072	20.0835	38.4254	47.8065	53.871	86.8316	110.842					cell10	1.1909	0.988771	1.15852	1.08685	0.823469		cell8	1.42934	1.24112	1.00997	0.935055	0.966296		cell31	20.8591	37.7968	46.901	67.0798	90.137	139.258	172.77	2.19373	8.9398
		cell9	47.0626	154.811	211.576	260.529	368.602	463.666	563.905					cell6	13.1611	65.4627	114.453	128.284	107.965	148.479	141.942					cell11	1.17763	1.39521	1.0446	0.968955	0.98684		cell9	1.10625	0.857088	0.957603	0.876715	0.93021		cell32	5.12279	43.9394	42.1428	77.3501	89.7608	104.71	114.075	1.67839	12.7014
		cell10	44.3424	87.9164	182.289	272.036	414.998	749.735	1040.94					cell7	5.59658	15.211	43.865	40.9585	49.0676	81.1025	86.5126					cell12	1.76929	1.0694	0.954609	0.948434	1.21305		cell10	1.18327	1.19869	1.0531	0.898952	1.00762		cell33	3.89327	66.3219	106.514	141.069	154.556	168.182	215.012	2.02687
		cell11	88.7864	133.757	193.218	206.427	297.507	334.467	334.321					cell8	13.4677	50.2474	82.3668	117.473	148.738	216.229	267.852					cell13	1.3196	1.55822	1.01619	0.999698	0.900379		cell11	1.36364	1.33565	1.0308	0.96319	0.739393		cell34	3.83479	81.7073	134.048	139.665	165.946	237.742	249.848	3.76072
		cell12	20.3052	66.761	134.374	155.254	212.42	290.586	386.097					cell9	3.52651	31.4573	38.4185	66.021	90.7116	158.245	209.481					cell14	1.90984	1.3675	1.2186	1.35286	0.870416		cell12	1.30204	1.25206	0.949378	0.936741	0.908552		cell35	6.20093	59.1238	99.0684	101.203	110.093	154.56	146.304	3.82181
		cell13	4.01097	41.5536	90.4935	205.37	285.027	505.353	759.351					cell10	6.73639	24.5307	67.492	114.514	172.86	212.879	229.326					cell15	1.97219	1.79468	1.09932	1.30924	0.886017		cell13	1.26581	1.3778	0.985437	0.902818	0.877585		cell36	23.0991	55.2202	68.8951	92.5802	100.264	151.586	131.086	2.49864
		cell14	60.6243	215.022	294.026	358.355	349.692	427.837	522.891					cell11	6.41509	17.1138	45.5923	111.885	156.604	209.412	235.479					cell16	2.15429	1.55073	1.47374	1.32086	0.93577		cell14	1.04884	0.936209	0.977656	0.846195	0.950643		cell37	13.3707	76.8761	113.636	97.0061	95.9978	130.344	141.125	1.9169
		cell15	22.8009	71.923	123.739	279.037	381.026	467.453	452.37					cell12	9.06908	65.6994	112.715	179.808	176.11	242.641	275.414					Cbln2-/- + Nrxn3SS4-							cell15	1.42054	1.08375	1.05627	0.866286	0.826255		cell38	20.2628	34.0254	64.1523	169.056	163.301	269.088	251.263	1.85384
		cell16	49.5514	158.029	256.291	343.883	393.151	527.817	649.305					cell13	6.92141	13.382	40.8833	96.2812	131.408	185.841	236.413					cell1	1.29756	1.33315	1.07056	0.911994	0.815556		cell16	1.24865	1.22014	1.01635	0.888625	0.89798		cell39	7.61791	27.4894	33.2767	47.0678	51.0573	85.0148	103.657	4.21106
		Cbln2-/- + Nrxn3SS4-												cell14	8.55038	21.3105	49.979	91.6994	163.691	259.855	311.049					cell2	1.98075	1.22353	0.932158	1.22127	0.987256		cell17	1.44852	0.916918	0.969276	0.953079	0.827781		cell40	5.40663	36.978	48.3718	60.881	143.719	144.876	176.577	1.06457
		cell1	22.3763	108.226	125.786	158.242	195.986	242.484	262.99					cell15	5.6129	51.2589	135.697	276.642	367.4	559.542	715.636					cell3	1.93116	1.3185	1.28222	1.20608	0.92657		cell18	1.75846	1.39053	1.01825	0.879163	0.986523		Cbln2-/-								3.00528
		cell2	31.7547	49.5624	73.3369	82.8432	73.5817	105.789	96.5931					cell16	3.60828	27.335	62.0462	82.623	121.732	200.88	282.262					cell4	1.60774	1.48671	1.07005	0.970804	1.01473		cell19	1.37739	1.1752	1.10646	0.911249	0.974299		cell1	8.61409	28.5327	53.1731	107.202	122.082	168.386	186.201
		cell3	3.91473	28.2904	50.5757	90.9128	152.809	186.735	306.221					cell17	5.44398	11.8179	31.0745	78.2849	104.937	164.455	217.701					cell5	1.34228	1.10019	1.29602	0.955509	0.938585		cell20	1.34115	1.23968	1.06425	0.941076	0.850865		cell2	22.5839	92.1127	113.224	126.563	166.769	302.984	389.333
		cell4	28.446	118.143	143.47	200.585	235.773	263.034	286.93					cell18	4.96181	39.2472	110.05	151.705	205.5	335.774	393.607					cell6	1.20887	1.39253	1.22659	0.884334	0.892778		cell21	1.6261	1.35628	1.01862	0.908595	0.823971		cell3	25.0581	41.1226	57.87	67.6557	95.3306	153.005	175.742
		cell5	3.44267	63.2518	73.802	69.6532	102.783	134.857	165.054					cell19	49.0384	74.7432	128.61	159.438	163.727	186.369	169.445					cell7	1.59906	1.39819	1.15438	1.48407	1.11831		cell22	1.19049	1.16219	1.10088	0.8759	0.948864		cell4	25.2672	84.2457	162.96	257.279	368.105	505.906	620.723
		cell6	7.37768	6.35803	53.9479	44.0362	64.8444	97.141	83.9374					cell20	31.615	43.0324	96.1481	101.892	104.444	125.3	168.543					cell8	1.46588	1.62256	1.38764	1.01838	0.992544		cell23	1.72714	1.32563	1.1557	0.940054	1.07524		cell5	5.38167	53.1162	75.9644	128.622	175.365	326.872	362.12
		cell7	8.15303	56.9218	145.733	132.187	84.7621	192.992	266.171					cell21	10.3871	28.6304	60.9069	102.157	130.136	164.542	220.207					cell9	1.75021	1.44427	1.11651	1.04649	0.784184		cell24	1.62901	1.30173	1.20627	0.900216	0.781463		cell6	16.0238	133.864	160.837	146.648	209.927	240.483	296.662
		cell8	7.25749	76.2942	136.258	316.043	252.569	366.95	420.77					cell22	6.62614	54.6678	84.1472	113.986	125.097	202.902	231.34					cell10	2.00694	1.12497	1.13403	1.00813	1.00786		cell25	1.37598	1.124	1.07719	0.926529	0.961158		cell7	27.3005	33.2178	122.09	128.715	154.045	172.838	203.186
		cell9	9.33788	88.387	152.501	164.226	234.316	356.139	367.099					cell23	1.38345	16.8501	50.9932	61.0185	110.431	150.612	167.763					cell11	1.87901	1.14104	1.09121	1.05016	0.747893		Cbln2-/- + Nrxn1SS4-							cell8	5.70395	42.5827	71.6337	102.851	124.317	92.864	149.832
		cell10	6.43041	52.1264	99.3162	185.908	201.912	258.436	275.224					cell24	3.15398	11.7678	35.0046	54.1167	77.1574	102.876	129.072					cell12	1.45092	1.34431	0.845659	1.17472	0.990799		cell1	1.22626	1.07595	1.03213	0.875815	0.889172		cell9	16.0043	38.1123	73.3473	106.722	112.62	155.591	150.436
		cell11	5.66321	83.7034	122.737	148.131	190.567	264.302	316.922					cell25	9.9894	34.9369	79.3093	140.431	191.749	243.557	258.22					cell13	1.57727	1.36072	1.0775	0.794421	0.901303		cell2	0.884267	1.01139	0.812333	0.835906	0.69318		cell10	28.4874	111.162	215.738	285.262	377.012	557.022	650.746
		cell12	6.96154	91.9153	117.643	137.246	161.632	264.254	330.987					cell26	9.93011	34.4457	75.183	112.195	179.637	238.254	307.27					cell14	1.12108	1.39886	0.784318	1.42229	1.01116		cell3	1.16558	1.39869	0.845038	0.94997	0.893784		cell11	18.4375	182.918	184.024	169.347	187.367	284.678	265.349
		cell13	15.7298	149.303	169.32	277.731	400.48	550.283	560.659					Cbln2-/- + Nrxn1SS4-												cell15	1.64958	1.46704	1.39787	1.15698	1.12996		cell4	2.00361	1.2878	0.985576	0.892104	0.968304		cell12	21.3763	63.2759	127.591	153.619	155.146	173.896	180.723
		cell14	4.14645	94.2071	249.443	172.41	229.345	369.496	515.689					cell1	3.8311	9.66982	19.3412	37.5039	44.3955	68.6994	82.8078					cell16	1.53154	1.48596	0.962762	1.25934	0.953613		cell5	1.68403	1.29169	1.11702	0.88132	0.938569		cell13	5.02378	60.8332	71.6389	157.91	145.129	186.327	309.411
		cell15	3.24698	18.3799	83.7984	178.567	221.244	405.326	466.59					cell2	13.2399	101.336	126.785	137.521	129.235	179.706	170.602					cell17	1.38197	1.68843	0.963757	1.02936	0.999571		cell6	1.24279	1.05116	1.01232	1.06426	0.962096		cell14	4.13958	58.0476	84.5967	81.6321	129.301	189	192.08
		cell16	4.05075	35.4686	46.1442	60.0272	94.1142	135.441	192.197					cell3	4.80999	47.6753	248.082	144.909	122.392	157.748	158.729					cell18	1.51509	1.33605	1.53671	1.08337	0.852562		cell7	1.82599	1.58127	1.13989	0.978326	0.943797		cell15	18.5457	183.794	255.544	374.822	477.143	682.85	793.747
		cell17	4.58541	37.5455	84.7599	98.8093	143.078	233.693	235.734					cell4	4.9859	12.4202	32.1468	34.7734	47.5149	67.2212	74.9216					cell19	1.45613	1.21602	1.00444	1.16268	1.05608		cell8	1.52319	1.22768	0.907806	0.930451	1.04059		cell16	17.7833	68.2763	85.3174	183.433	273.47	381.162	501.219
		cell18	4.41247	21.6956	43.3675	122.923	146.231	204.58	276.426					cell5	5.59686	19.9523	35.4394	51.565	61.698	127.642	179.708					cell20	1.5388	1.08665	1.01688	1.0372	0.962059		cell9	1.2911	1.31908	1.03177	0.926129	1.03772		cell17	21.4856	69.4612	130.432	160.284	178.957	220.468	223.882
		cell19	15.5976	51.2045	91.6908	128.459	124.22	201.841	137					cell6	3.9676	9.82037	38.5416	60.0593	101.899	149.645	164.455					cell21	1.5831	0.96528	1.31668	0.895324	0.956715		cell10	1.72	1.56693	1.00963	0.833519	0.900991		cell18	21.1684	166.464	214.562	245.1	233.83	304.759	335.123
		cell20	5.80945	46.943	29.5186	60.7552	99.6563	128.463	230.845					cell7	8.41627	30.4039	55.284	87.8778	80.6091	109.994	192.381					cell22	1.8435	1.24252	1.06022	0.807599	1.00709		cell11	1.46662	1.39034	1.15053	1.02012	1.12662		cell19	14.4825	38.2508	96.3094	151.559	149.74	137.096	161.16
		cell21	14.0286	30.7039	52.221	55.3557	85.6661	216.768	266.195					cell8	4.94599	21.0318	34.9967	60.7506	89.2483	108.918	143.064					cell23	1.26009	1.04359	0.896679	1.03053	0.714405		cell12	1.22046	1.14335	1.07472	0.907541	0.985436		cell20	13.1372	57.7239	93.0288	107.949	120.394	153.222	209.879
		cell22	12.4688	148.741	216.428	287.967	276.543	445.712	417.024					cell9	2.73093	20.782	29.8902	52.5926	67.4801	103.094	157.86					cell24	1.79155	1.85658	1.19442	0.941077	0.793352		cell13	1.39327	1.17234	1.10607	0.90497	0.95987		cell21	14.4977	58.5349	62.7565	147.758	219.654	231.664	275.444
		cell23	80.1736	274.474	258.027	369.481	387.881	654.639	477.293					cell10	10.4946	38.5095	86.8839	202.467	288.349	410.193	455.52												cell14	1.25308	1.24892	1.15019	1.03499	1.02416		cell22	15.0626	87.4758	63.8088	87.6135	145.848	137.678	124.379
		cell24	97.3114	149.365	206.615	229.426	253.839	286.175	412.378					cell11	7.952	30.7913	65.3847	93.2319	91.8188	102.788	92.3154												cell15	1.53222	1.2937	1.20923	1.05206	0.910624		cell23	3.40403	13.2667	90.2731	85.7131	155.276	137.068	152.019
		cell25	65.454	159.232	242.423	340.122	536.178	755.327	803.407					cell12	-0.751982	10.6366	47.616	80.3606	93.6428	128.502	195.242												cell16	1.68759	1.40199	1.22261	0.913192	0.897331		cell24	59.8384	126.385	177.126	146.134	204.697	213.948	252.517
		cell26	31.3718	115.45	192.953	229.246	373.96	417.848	496.193					cell13	5.81948	15.05	26.7631	66.0393	83.2294	146.545	185.316												cell17	1.4856	1.32973	1.1835	0.866032	0.962604		cell25	28.8691	115.59	153.873	170.828	189.751	231.483	268.056
														cell14	19.763	90.507	151.779	196.811	230.954	289.296	369.694												cell18	1.35464	1.3024	0.986064	0.898252	0.952121		cell26	40.8299	111.471	297.219	509.002	529.476	789.301	824.572
														cell15	9.38977	33.3766	57.746	65.285	95.177	186.214	192.127												cell19	1.67136	1.47608	1.23847	0.995175	1.1036		cell27	19.94	197.706	212.781	339.436	426.402	594.596	768.516
														cell16	9.28441	35.5398	86.444	104.437	138.816	171.561	204.236												cell20	1.42013	1.37428	1.05948	0.778548	0.935979		cell28	5.45876	84.8613	220.206	334.031	567.989	717.623	775.557
														cell17	4.78195	42.2077	92.6326	154.52	181.4	235.953	257.162												cell21	1.06713	0.932076	0.883779	0.825771	0.890058		cell29	5.55258	19.92	29.1186	94.6573	127.487	227.017	300.555
														cell18	8.195	35.3546	67.6457	125.566	184.475	270.593	301.014												cell22	1.03727	1.20785	1.07229	0.966073	0.954761		cell30	5.90972	132.572	120.717	237.472	400.45	512.836	706.29
														cell19	8.89877	31.7187	80.4163	132.26	188.174	302.89	384.401												cell23	1.55469	1.39409	1.09368	0.908992	1.01787		cell31	47.5054	191.732	378.577	449.351	553.767	653.172	644.607
														cell20	10.9013	27.0867	81.1884	148.99	190.594	283.556	327.461												cell24	1.54354	1.37263	1.16491	1.01505	0.942869		Cbln2-/- + Nrxn3bSS4+
														cell21	0.231981	11.9148	41.7973	82.4866	98.221	155.472	216.23												cell25	1.25193	1.04208	0.96188	0.863898	0.92376		cell1	3.49624	27.2983	103.247	113.766	171.181	171.691	193.625
														cell22	8.28049	18.1638	45.9581	122.253	200.096	295.364	383.892																			cell2	8.9535	16.1215	23.344	35.6885	36.5377	63.2822	37.4574
														cell23	13.9467	54.335	159.474	265.361	394.639	517.168	566.846																			cell3	24.1736	187.192	228.649	286.031	267.312	278.805	271.181
														cell24	3.83599	39.6554	104.133	174.593	206.949	281.896	341.127																			cell4	15.4467	71.9843	121.414	194.589	192.456	254.399	348.356
														cell25	2.81108	19.8678	63.8987	107.186	179.11	250.26	322.099																			cell5	2.91417	38.3344	60.9679	87.0132	125.684	111.436	156.408
														cell26	4.171	5.75742	30.1843	41.2288	63.392	114.582	138.672																			cell6	10.7487	38.941	65.581	87.6447	138.307	179.065	227.571
																																								cell7	2.85193	16.6123	22.9006	58.7309	52.2995	92.466	107.16
																																								cell8	10.131	39.2554	74.9473	126.397	220.052	220.384	344.709
																																								cell9	7.37293	49.3836	69.4435	109.037	108.508	235.675	249.212
																																								cell10	32.435	57.7337	177.406	234.859	270.578	350.439	451.651
																																								cell11	5.47808	106.398	111.85	138.299	222.322	298.769	319.886
																																								cell12	20.6502	141.06	244.068	329.75	337.461	438.931	498.3
																																								cell13	67.4218	120.88	176.339	219.799	216.182	293.116	297.078
																																								cell14	43.3916	112.411	180.091	241.232	350.011	425.622	439.858
																																								Cbln2-/- + Nrxn3bSS4-
																																								cell1	34.0648	118.811	157.561	170.073	178.393	204.413	223.422
																																								cell2	2.80149	20.8357	34.4794	84.2761	98.2279	195.874	264.873
																																								cell3	7.43947	10.7925	36.225	82.908	124.687	150.032	136.027
																																								cell4	3.14234	10.2875	67.3948	65.8677	123.467	168.455	155.165
																																								cell5	6.02728	23.8339	70.4536	88.7099	184.915	214.966	301.479
																																								cell6	7.99798	34.165	122.08	170.628	151.854	245.584	222.447
																																								cell7	72.8106	256.507	318.417	525.493	573.531	985.872	1240.19
																																								cell8	20.5748	42.0718	34.9759	55.7235	94.2043	103.152	102.13
																																								cell9	20.5154	44.4396	92.632	204.317	182.908	259.255	198.951
																																								cell10	22.1189	39.6353	104.17	96.3785	163.923	202.47	312.353
																																								cell11	21.635	225.913	292.772	332.795	412.46	692.447	712.941
																																								cell12	7.21639	96.9131	113.931	175.026	296.113	334.836	384.547
																																								cell13	7.99033	28.3624	61.1583	100.274	113.666	220.758	241.948
																																								cell14	58.4291	80.5571	108.707	164.698	211.185	258.612	280.026
																																								cell15	58.6553	130.837	156.43	184.756	210.915	300.797	285.204
[truncated: 27 more columns]
