# Supplementary material for: Distinct neurexin-cerebellin complexes control AMPA- and NMDA-receptor responses in a circuit-dependent manner
Source: eLife. 2022 Oct 7;11:e78649. doi: 10.7554/eLife.78649 (PMC9586558; doi:10.7554/eLife.78649)
Supplement: Figure 5—figure supplement 2—source data 1. [file elife-78649-fig5-figsupp2-data1.xlsx]

## Sheet: Sheet1
Figure 5-figure supplement 2A	Cbln2+/+							Cbln2-/-							Figure 5-figure supplement 2B	Cbln2+/+							Cbln2-/-
mRNA level	Nrxn1	Nrxn2	Nrxn3	Cbln1	Cbln2	GluD1	GluD2	Nrxn1	Nrxn2	Nrxn3	Cbln1	Cbln2	GluD1	GluD2	mRNA level	Nrxn1	Nrxn2	Nrxn3	Cbln1	Cbln2	GluD1	GluD2	Nrxn1	Nrxn2	Nrxn3	Cbln1	Cbln2	GluD1	GluD2
	0.1279	0.1066	0.1068	0.0071707	0.1399	0.019	0.0122	0.2147	0.1613	0.1503	0.0094056	1.1788e-05	0.0371	0.0117		0.318	0.1398	0.1388	0.031	0.1645	0.0235	0.0158	0.2472	0.1386	0.0771	0.0556	0.00019575	0.0155	0.0131
	0.1716	0.11	0.0739	0.0062156	0.1243	0.015	0.0108	0.1784	0.1392	0.1538	0.0071921	2.8123e-06	0.0205	0.0143		0.1539	0.1754	0.1063	0.0195	0.1154	0.0174	0.0155	0.1554	0.1419	0.099	0.0291	0.00013957	0.0241	0.0141
	0.1953	0.1503	0.1471	0.0097302	0.2311	0.0188	0.0103	0.0852	0.1008	0.0966	0.0105	0.00017641	0.0115	0.0079167		0.1652	0.0946	0.1232	0.0381	0.1685	0.0169	0.0106	0.1681	0.0958	0.1343	0.0221	3.1238e-05	0.0233	0.0164
