# Supplementary material for: Distinct neurexin-cerebellin complexes control AMPA- and NMDA-receptor responses in a circuit-dependent manner
Source: eLife. 2022 Oct 7;11:e78649. doi: 10.7554/eLife.78649 (PMC9586558; doi:10.7554/eLife.78649)
Supplement: Figure 6—source data 1. [file elife-78649-fig6-data1.xlsx]

## Sheet: Sheet1
	Figure6C	AMPA/NMDA Quantification						Figure6D		Interstimulus interval (ms)			Figure6E	AMPA/NMDA Quantification						Figure6F		Interstimulus interval (ms)			Figure6G	AMPA/NMDA Quantification						Figure6H		Interstimulus interval (ms)
two-tailed unpaired t-test p-values		Dcre	Cre	Dcre	Cre	Dcre	Cre		Dcre	40	100	400		Dcre	Cre	Dcre	Cre	Dcre	Cre		Dcre	40	100	400		Dcre	Cre	Dcre	Cre	Dcre	Cre		Dcre	40	100	400
with comparing to control for all panels		p = 0.00769		p = 0.67444		p = 0.00782			cell1	1.28167	1.09133	0.592138		p = 0.01630		p = 0.57673		p = 0.00298			cell1	1.12996	0.932954	0.727191		p = 0.90543		p = 0.71061		p = 0.65478			cell1	1.21807	0.90585	0.600692
except PPR using two-way ANOVA		AMPA/NMDA Ratio		AMPAR EPSC (pA)		NMDAR EPSC (pA)			cell2	1.45012	0.91269	0.589779		AMPA/NMDA Ratio		AMPAR EPSC (pA)		NMDAR EPSC (pA)			cell2	1.01433	1.06257	0.694601		AMPA/NMDA Ratio		AMPAR EPSC (pA)		NMDAR EPSC (pA)			cell2	1.81689	0.955787	0.599096
		1.26542	1.80786	149.667	307.646	118.274	170.172		cell3	1.30484	0.617796	0.479018		3.90104	1.29476	219.377	288.739	56.2357	223.006		cell3	1.23654	0.746638	0.519817		1.65756	1.14229	315.073	164.3	190.082	143.834		cell3	0.97934	0.555628	0.72033
		0.967228	3.19234	77.9945	164.744	80.6372	51.6062		cell4	0.979298	0.657607	0.828308		1.71087	1.05477	111.869	131.594	65.3874	124.76		cell4	0.975951	0.656802	0.442454		0.518374	3.28147	135.565	259.427	261.52	79.0581		cell4	0.939961	0.690285	0.546168
		0.551691	1.12003	164.194	133.745	297.621	119.411		cell5	1.3788	1.29676	1.01699		1.61037	1.49407	409.141	273.811	254.066	183.265		cell5	1.19281	0.920927	0.662459		1.89245	1.10289	124.314	76.3785	65.6898	69.2531		cell5	0.832411	0.92223	0.762118
		1.68986	2.66112	405.377	133.818	239.888	50.2864		cell6	1.05421	0.879988	0.841925		1.47186	1.43052	368.974	215.371	250.686	150.555		cell6	1.67384	0.760876	0.554852		2.59888	0.949026	268.618	73.4272	103.359	77.3712		cell6	1.24465	0.614503	0.572419
		1.11008	4.67154	223.793	224.443	201.6	48.0448		cell7	1.52941	1.09219	0.943063		1.40955	1.16317	496.723	134.127	352.399	115.311		cell7	1.21639	0.751936	0.508406		3.2034	0.887811	168.739	117.822	52.6751	132.711		cell7	1.7917	0.755616	0.745307
		2.04004	1.00738	145.052	123.313	71.1026	122.41		cell8	1.08274	1.13991	0.765637		1.98312	4.30017	188.165	710.014	94.8834	165.113		cell8	1.07628	0.959925	0.764211		2.95829	0.850294	357.749	249.167	120.931	293.037		cell8	1.11002	0.956932	0.737731
		2.80867	1.68342	273.793	126.531	97.4811	75.1627		Cre					1.20882	2.23975	375.24	194.92	310.418	87.0277		cell9	1.89561	1.33327	0.856567		1.52778	1.64228	406.698	111.003	266.201	67.5907		cell9	1.13954	0.787942	0.685618
		1.55008	8.22315	383.824	212.702	247.616	25.8663		cell1	1.48	1.09142	0.707171		1.18907	4.94348	266.131	277.829	223.814	56.2011		cell10	1.01952	0.675092	0.421733		0.890774	1.89986	292.066	114.744	327.879	60.396		cell10	1.1063	0.717178	0.913754
		2.14448	2.94032	245.837	130.571	114.637	44.407		cell2	2.24178	1.11969	0.778664		2.1563	8.62321	527.869	102.799	244.803	11.9212		cell11	0.771365	0.973927	0.663943		2.64455	1.4944	318.953	551.222	120.608	368.858		Cre
		2.30618	1.6983	325.788	361.265	141.267	212.721		cell3	0.923523	0.734826	0.644934		0.958705	6.60613	292.053	374.339	304.633	56.6653		Cre					0.752375	2.15084	370.993	475.946	493.097	221.284		cell1	1.02321	0.901274	0.906615
		1.10205	4.87465	176.776	360.309	160.407	73.9147		cell4	0.606502	0.643124	0.533796		0.559137	3.72552	291.976	133.19	522.191	35.7507		cell1	1.83555	1.28443	0.773419		0.608213	1.2256	77.3306	264.696	127.144	215.971		cell2	0.874586	0.873488	0.708543
		1.47084	2.36891	97.5653	174.941	66.3331	73.8488		cell5	0.58173	0.631155	0.54721		2.58421	1.78513	519.681	347.085	201.099	194.431		cell2	1.06227	0.933893	0.523962		1.03561	1.90561	269.126	200.843	259.872	105.396		cell3	1.69952	1.09479	0.991971
			6.25288		307.166		49.1239		cell6	1.11017	0.881125	0.844036		1.53763	2.94233	145.705	243.814	94.759	82.8644		cell3	1.21154	0.930017	0.607636		0.699989	2.99191	109.951	350.883	157.076	117.277		cell4	0.817497	0.779707	0.600472
			4.99858		155.368		31.0825		cell7	0.753234	0.816937	0.76242		1.12803	2.35502	503.782	282.987	446.602	120.163		cell4	1.11945	1.05222	0.714041		1.31209	1.93416	89.6043	276.458	68.2911	142.935		cell5	0.985841	0.929729	0.6533
			3.10866		183.427		59.0052		cell8	0.647897	0.911279	1.0153		1.0433	1.82938	165.001	233.755	158.153	127.778		cell5	1.28957	0.86664	0.749499		2.22917	1.59784	130.108	405.917	58.3663	254.041		cell6	1.00172	0.726283	0.663785
															4.87623		724.922		148.664		cell6	0.812677	0.76844	0.753191		2.18074	3.05444	561.501	589.219	257.482	192.906		cell7	1.01238	0.747804	0.698252
																					cell7	1.15528	0.807541	0.776484		3.79804		219.759		57.8611			cell8	1.22932	0.899688	0.635622
																																	cell9	1.75949	0.803318	1.03533
																																	cell10	1.90146	0.87193	0.927298
