# Supplementary material for: Distinct neurexin-cerebellin complexes control AMPA- and NMDA-receptor responses in a circuit-dependent manner
Source: eLife. 2022 Oct 7;11:e78649. doi: 10.7554/eLife.78649 (PMC9586558; doi:10.7554/eLife.78649)
Supplement: Figure 7—source data 1. [file elife-78649-fig7-data1.xlsx]

## Sheet: Sheet1
	Figure7C	Cbln2+/+	Cbln2-/-	Figure7E	Cbln2+/+	Cbln2-/-	Cbln2+/+	Cbln2-/-	Cbln2+/+	Cbln2-/-	Cbln2+/+	Cbln2-/-	Cbln2+/+	Cbln2-/-	Cbln2+/+	Cbln2-/-	Cbln2+/+	Cbln2-/-
two-tailed unpaired t-test p-values		p = 0.74769			p = 0.39469		p = 0.12979		p = 0.27753		p = 0.57121		p = 0.07547		p = 0.16276		p = 0.25097
for all panels		spine density/mm			vGluT1 size (mm2)		Homer1 size (mm2)		vGluT1 intensity (a.u.)		Homer1 intensity (a.u.)		vGluT1 density/10 mm2		Homer1 density/10 mm2		vGluT1&Homer1 density/10 mm2
		0.659921	0.500715		0.4419	0.3669	0.3837	0.2019	1027.39	1103.55	1154.43	1161.5	3.6892	3.5184	8.1769	8.5844	3.123	2.506
		0.833333	0.736707		0.5459	0.4436	0.4694	0.2359	1052.5	1092.29	1173.33	1165.42	3.8448	4.2559	7.6764	8.4473	3.4259	3.3092
		0.41876	0.52504		0.505	0.4321	0.4758	0.1852	1039.86	1117.92	1170.9	1140.11	3.7936	3.8284	7.8149	7.4651	3.3928	2.5055
		0.585009	0.76297		0.4631	0.2463	0.5121	0.2511	1029.07	1070.09	1169.07	1118.57	3.859	2.1553	7.7555	8.4599	3.5082	1.6262
		0.822368	0.595511		0.516	0.2538	0.566	0.2371	1057.91	1064.8	1175.96	1117.2	3.9659	2.1529	7.5458	8.4461	3.6235	1.626
		0.568752	0.841751		0.3686	0.2355	0.4987	0.2168	1034.27	1080.03	1156.73	1128.17	3.67	2.0853	7.6747	8.2137	3.2934	1.5179
		0.672646	1.05187		0.5015	0.3575	0.4347	0.351	1035.83	1064.58	1143.93	1124.54	3.6472	3.938	7.9992	9.0223	3.1001	3.2787
		0.632022	0.837321		0.5286	0.3834	0.4803	0.384	1050.29	1061.42	1147.08	1140.1	3.8938	3.6616	7.9752	8.4261	3.5126	3.1895
		0.665266	0.808937		0.4201	0.3592	0.3355	0.3097	1032.32	1064.67	1112.44	1113.6	3.4551	3.3749	8.2593	8.3868	2.8629	2.6798
		0.324851	0.549249		0.4312	0.432	0.4135	0.1532	1028.42	1058.44	1124.38	1088.99	3.6517	3.9742	8.0446	6.674	3.1717	2.575
		0.577558	0.685267		0.3965	0.4848	0.4172	0.1615	1017.32	1069.75	1121.77	1088.76	3.5476	3.6806	8.0451	6.6869	3.1157	2.3741
		0.598592	0.622407		0.3747	0.4474	0.3124	0.1678	1018.53	1051.93	1095.39	1076.09	2.8203	3.7962	7.7234	7.0339	2.2574	2.446
		0.767018	0.595883		0.966	0.4621	0.18	0.2064	1157.69	1059.6	1103.77	1098.84	3.9485	4.0249	6.5318	8.2784	2.7738	2.9442
		0.780031	0.866393		1.0488	0.5426	0.1911	0.2495	1169.35	1057.93	1119.41	1104.15	3.7883	4.3921	6.2865	8.5148	2.6109	3.3592
		0.863465	0.853842		0.9604	0.4443	0.174	0.219	1148.89	1062.89	1100.91	1085.93	3.8604	4.1323	6.0767	8.0096	2.7101	2.9769
		0.745614	0.509259		0.7383	0.551	0.125	0.3253	1137.71	1082.94	1079.86	1145.35	3.9596	3.9184	3.7645	8.3658	1.7685	3.1901
		0.789344	0.714586		0.7669	0.5801	0.1273	0.3354	1140.48	1091.88	1095.39	1149.09	4.1556	3.9358	3.7131	8.1189	1.8381	3.3951
		0.726185	0.752212		0.6819	0.4444	0.1232	0.2621	1122.7	1075.72	1095.56	1141.68	3.9228	3.8901	3.4061	8.6695	1.5008	3.0947
		0.640394	0.668524		0.3187	0.4512	0.3141	0.2753	1042.76	1076.67	1179.1	1116.71	2.905	3.8166	8.899	8.4076	2.3402	3.0176
		0.421053	0.615511		0.3075	0.5194	0.3141	0.3077	1040.65	1085.69	1185.66	1151.77	3.0976	3.9969	9.3748	8.4086	2.5035	3.3599
		0.764575	0.460299		0.32	0.4393	0.2902	0.2405	1036.69	1081.98	1172.19	1118.27	2.7834	3.956	9.1569	8.2735	2.2532	2.8955
		0.59817	0.57294		0.5731	0.5028	0.4778	0.2753	1053.04	1080.68	1153.02	1137.42	3.9073	4.1444	7.8966	8.4376	3.5744	3.2721
		0.636183	1.08		0.5493	0.528	0.4951	0.2861	1046.97	1087.84	1166.17	1138.63	3.9123	4.0376	7.9015	8.1929	3.5231	3.1546
		0.838574	0.607761		0.4866	0.5062	0.4088	0.2627	1043.09	1085.06	1145.21	1123.75	4.0515	3.9405	8.3331	7.8067	3.5666	3.1124
		0.733089	0.722674		0.3142	0.575	0.3178	0.2671	1037.98	1090.7	1168.68	1129.89	2.5914	3.9118	9.1481	8.1283	2.1657	3.0339
		0.642467	0.549753		0.2951	0.7611	0.3655	0.3085	1022.54	1095.86	1174.19	1140.46	3.0281	4.1577	9.2913	7.8957	2.5384	3.3492
		0.558036	0.701754		0.283	0.6666	0.2978	0.2457	1038.92	1077.56	1157.1	1121.77	2.397	3.976	9.0369	7.7966	1.8955	2.9793
		0.606878	0.77173		0.9578	0.9101	0.1885	0.543	1155.78	1102.49	1115.77	1212.1	4.1409	3.9464	6.7944	7.6057	2.9957	3.6368
		0.33284	0.607639		1.1185	0.8431	0.204	0.5584	1190.71	1108.22	1120.6	1209.87	3.6674	3.9075	7.1453	7.1894	2.982	3.5947
		0.535655	0.467654		0.9527	0.6978	0.1975	0.6338	1182.02	1103.68	1123.85	1198.59	3.8874	3.9346	6.576	6.9094	2.8671	3.6064
		0.637649	0.494525		0.277		0.3296		1021.63		1112.27		2.1499		8.7651		1.7518
		0.878675	0.537996		0.2811		0.3321		1027.48		1116.02		2.6112		8.9972		2.1807
		0.711744	0.533049		0.2052		0.3117		1018.67		1107.64		2.2193		9.0639		1.7784
		0.453752	0.484809
		0.743931	0.606586
		0.616114	0.267789
		0.657174	0.595238
		0.529355	0.575658
		0.716235	0.754976
		0.506823	0.275786
		0.417014	0.614964
		0.452489	0.766284
		0.554288	0.535906
		0.869925	0.603926
		0.466045	0.652985
		0.673575	0.503202
		0.659264	0.646465
		0.763825	0.701139
		0.706582	1.07296
		0.697579	0.829726
		0.775194	0.631068
		0.643863
