# Supplementary material for: Distinct neurexin-cerebellin complexes control AMPA- and NMDA-receptor responses in a circuit-dependent manner
Source: eLife. 2022 Oct 7;11:e78649. doi: 10.7554/eLife.78649 (PMC9586558; doi:10.7554/eLife.78649)
Supplement: Figure 8—source data 1. [file elife-78649-fig8-data1.xlsx]

## Sheet: Sheet1
	Figure8C		Stimulation Itensity (mA)							Slope		Figure8D	CV		Figure8E		Stimulation Itensity (mA)							Slope		Figure8F	CV		Figure8G		Stimulation Itensity (mA)							Slope		Figure8H	CV
two-tailed unpaired t-test p-values	AMPAR EPSCs	Cbln1f/f	10	20	30	40	50	75	100	p = 0.00397			p = 0.32565		AMPAR EPSCs	Nrxn1SS4+	10	20	30	40	50	75	100	p = 0.82238			p = 0.89125		AMPAR EPSCs	Nrxn3SS4+	10	20	30	40	50	75	100	p = 0.01341			p = 0.39777
with comparing to control for all panels	Cbln1cko to Cbln1f/f : p < 0.0001	cell1	24.4603	118.496	145.045	183.436	247.709	606.986	914.455	Cbln1f/f	Cbln1dcko		Cbln1f/f	Cbln1dcko		cell1	7.65588	50.4765	81.4725	135.08	185.735	365.81	268.962	Nrxn1SS4+	Nrxn1SS4-		Nrxn1SS4+	Nrxn1SS4-	Nrxn3SS4- to Nrxn3SS4+ : p < 0.0001	cell1	3.3919	200.062	328.066	470.698	665.798	1043.59	1185.47	Nrxn3SS4+	Nrxn3SS4-		Nrxn3SS4+	Nrxn3SS4-
except input/output curves using two-way ANOVA		cell2	9.39227	190.358	354.888	580.369	879.396	1510.18	1888.14	9.87968	17.192		0.1401	0.1071		cell2	7.11881	2.75716	35.2748	223.189	444.569	881.274	621.535	3.59593	3.08154		0.0835	0.1458		cell2	3.79552	51.6321	139.088	304.066	456.008	814.184	1234.29	13.5652	15.4994		0.0516	0.1221
		cell3	6.13347	107.577	218.939	299.736	426.003	744.024	1063.65	21.9534	14.235		0.0545	0.1145		cell3	1.35357	320.188	345.492	446.024	609.984	785.344	626.695	9.56259	15.7481		0.058	0.0869		cell3	3.68727	32.7641	143.179	296.047	421.937	667.337	832.416	14.1277	14.3187		0.0577	0.0513
		cell4	25.3146	110.924	241.351	323.254	473.978	866.743	1148.87	11.7915	17.2415		0.1408	0.1006		cell4	4.02401	3.11993	15.0768	118.297	267.287	531.608	590.567	6.8153	9.27561		0.1823	0.129		cell4	11.9025	30.8128	54.1935	80.5247	116.691	374.775	481.933	9.92622	5.73646		0.0984	0.1659
		cell5	7.90715	202.29	499.977	788.163	1223.07	1011.41	1450.56	12.9408	13.9845		0.1126	0.1209		cell5	5.09717	11.3684	79.7848	148.831	257.014	473.397	535.632	7.71138	15.2858		0.1507	0.1116		cell5	1.35025	36.1989	58.0975	83.0027	100.664	121.11	116.16	5.68061	22.173		0.1734	0.4134
		cell6	1.58481	283.312	589.358	818.957	980.892	1249.41	1463.99	15.2525	32.6148		0.1027	0.0564		cell6	11.6406	154.242	288.814	336.543	405.77	534.956	671.143	6.69092	4.99642		0.1687	0.1375		cell6	23.0559	31.7012	60.6017	112.906	220.775	316.216	366.049	1.25068	4.78621		0.0936	0.5621
		cell7	1.2611	77.115	166.563	256.093	332.927	505.282	685.617	15.7622	12.103		0.0281	0.0715		cell7	4.58429	121.193	219.435	336.317	459.554	540.44	549.503	6.83912	4.1532		0.0693	0.3144		cell7	7.02266	6.9354	4.38449	18.3629	135.137	148.065	137.134	4.31331	5.44069		0.098	0.1023
		cell8	17.2303	11.5079	42.0282	149.848	213.246	413.639	645.741	7.60282	16.8456		0.0893	0.1183		cell8	6.46976	262.315	415.594	476.877	563.898	708.892	909.11	6.19365	3.95107		0.1084	0.2562		cell8	6.10612	5.12596	6.23729	101.85	226.055	433.447	410.1	1.89378	10.4826		0.2614	0.0864
		cell9	11.4231	105.695	225.02	252.05	361.652	622.503	839.887	7.38729	19.0928		0.0642	0.0717		cell9	9.59081	139.551	202.831	242.012	286.086	404.294	498.301	8.93163	7.00177		0.0563	0.2987		cell9	5.69158	5.54218	200.258	374.717	484.336	637.453	703.648	5.64076	7.03313		0.0987	0.0628
		cell10	12.9853	50.9367	91.7973	206.892	319.936	607.008	942.078	9.20269	12.8198		0.1023	0.0645		cell10	3.46972	3.28809	7.54669	10.7481	17.0125	36.5291	183.681	5.0271	6.48297		0.0802	0.157		cell10	22.7902	15.9299	2.12835	109.948	241.286	451.085	547.116	8.54671	6.13773		0.0308	0.1511
		cell11	4.29343	25.5229	150.809	301.348	539.04	785.442	667.659	10.6527	17.5267		0.1353	0.078		cell11	3.12539	2.87341	14.0789	109.363	224.159	398.157	460.651	1.74596	2.3763		0.1974	0.332		cell11	32.2914	150.646	237.768	311.444	367.85	414.991	386.444	6.80394	5.12032		0.0718	0.0381
		cell12	2.97707	10.0838	50.4271	209.097	381.744	826.983	1028.07	9.09387	19.7202		0.0268	0.0686		cell12	10.853	3.08567	88.3276	296.456	570.687	932.146	1050.83	5.91977	2.30111		0.1429	0.1391		cell12	0.619477	64.2695	368.219	564.451	670.021	743.579	655.533	3.77867	8.86766		0.0937	0.0817
		cell13	4.38289	101.766	234.056	316.848	421.241	786.388	1012.09	12.8434	30.8826		0.0542	0.0426		cell13	8.64692	34.4454	68.5451	113.697	184.877	289.767	204.155	13.4419	3.94871		0.1092	0.1186		cell13	10.7976	5.4684	9.49152	100.026	208.839	398.424	469.398	7.84611	17.8947		0.1105	0.072
		cell14	31.7174	177.812	335.162	436.804	636.976	1010.23	924.419	11.5083	18.988		0.0826	0.0509		cell14	27.4237	46.9467	101.846	148.619	184.874	241.579	339.006	2.78241	1.42714		0.1887	0.2125		cell14	4.93516	8.11781	8.41105	60.4291	139.981	264.635	383.927	5.95437	17.4159		0.3816	0.2257
		cell15	33.6428	182.326	264.484	377.644	577.12	975.522	1304.99	11.0164	12.2476		0.1129	0.0574		cell15	12.6117	29.2352	58.1036	79.8012	80.7792	124.511	141.958	3.4553	4.07083		0.1204	0.1151		cell15	11.8694	96.0831	189.723	237.668	220.549	232.433	186.363	4.59059	5.20991		0.3463	0.0728
		cell16	3.52178	155.264	303.785	434.874	616.356	883.586	1189.26	14.4186	7.70009		0.0877	0.0779		cell16	6.45478	20.3737	38.1018	35.733	43.2755	66.3285	96.2964	1.4499	1.51205		0.3609	0.1724		cell16	0.646927	41.448	92.7428	367.047	438.726	782.413	624.958	1.62299	5.63273		0.1577	0.1015
		cell17	0.592082	183.889	338.036	492.424	651.331	887.872	1116.25	13.1118	17.1167		0.0848	0.035		cell17	9.96553	21.1919	55.6309	56.1592	79.2046	156.487	129.72	0.924354	5.4978		0.3158	0.1583		cell17	2.16291	72.5709	146.754	258.573	316.762	304.563	307.508	8.68153	6.57442		0.4098	0.1591
		cell18	1.52796	68.2733	136.788	152.766	197.359	369.357	488.767	12.2425	15.5147		0.0526	0.0755		cell18	4.88753	58.6009	113.239	129.436	125.944	156.691	126.03	1.57482	1.81293		0.3089	0.1		cell18	2.87699	7.18593	152.445	280.082	373.39	498.318	483.827	3.35284	9.7116		0.2302	0.1014
		cell19	41.4186	237.321	370.17	605.685	830.879	1085.81	1544.3	5.36018	13.8513		0.1139	0.0406		cell19	10.3456	33.5856	51.9438	79.0143	69.5173	34.8297	109.354	1.20268	0.963958		0.2502	0.2355		cell19	7.64513	6.3764	53.8623	109.351	195.032	237.627	336.482	6.11208	5.17279		0.2907	0.2006
		cell20	3.28772	41.8807	99.8264	180.743	371.405	574.596	820.475	16.3966	10.7311		0.0383	0.0493		cell20	8.28104	6.564	9.4522	62.8663	150.604	256.645	326.083	0.741558			0.3574			cell20	34.1721	259.709	332.594	367.183	360.952	461.658	400.733	3.88966	2.85432		0.379	0.144
		cell21	1.10167	103.276	227.201	281.384	397.493	759.863	1348.63	9.55462			0.0639			Nrxn1SS4-								4.02683			0.1899			cell21	12.3686	140.769	212.784	242.493	278.344	372.432	331.238	3.31594	3.2279		0.1095	0.1674
		cell22	6.0898	152.507	238.242	328.226	394.828	576.763	784.335	14.4253			0.0537			cell1	22.0352	89.9449	157.482	198.859	208.987	269.434	321.07							cell22	71.9734	376.324	498.951	521.507	513.218	474.374	438.642	3.33918	4.67698		0.1087	0.1498
		cell23	4.5784	218.908	490.247	645.494	863.328	1258.32	1680.46	8.22282			0.0927			cell2	47.218	199.205	278.352	514.021	774.471	1062.61	1433.35							cell23	8.82058	21.428	44.2048	54.1603	70.7761	86.2271	136.544	2.44676	4.92218		0.0687	0.1235
		Cbln1cko								18.3746			0.0822			cell3	3.40568	11.5405	31.829	240.003	398.582	637.985	724.792							cell24	30.336	23.8154	133.485	190.704	228.263	392.449	437.131	1.33692	12.9711		0.2246	0.0326
		cell1	3.00261	11.8203	43.3241	139.254	345.451	858.876	1493.74							cell4	3.21299	4.94427	51.5579	155.692	287.006	781.76	1325.25							cell25	5.23848	32.6676	40.7292	54.424	38.433	121.74	157.556	5.01885	6.04932		0.1824	0.1166
		cell2	2.59315	101.45	215.321	369.227	529.653	908.321	1246.21							cell5	3.4043	30.8959	82.602	142.675	246.405	333.066	428.878							cell26	22.5971	194.697	227.909	281.914	295.685	330.558	690.431	1.65397	6.08305		0.3756	0.2242
		cell3	6.3054	13.5449	55.5634	283.652	468.229	834.662	1528.22							cell6	6.13024	0.963563	6.81596	10.7064	125.116	270.485	323.346		0.822385			0.891253		Nrxn3SS4-								5.95831			0.1068
		cell4	2.45096	256.023	722.524	1024.17	1414.34	1332.86	1242.88							cell7	4.14731	10.2232	48.1468	86.4611	138.557	246.158	337.636							cell1	1.93257	21.1375	191.576	393.295	616.987	1163.27	1202.41
		cell5	4.44925	4.1037	207.812	773.399	1302.84	2104.64	2626.86							cell8	9.42169	13.0438	32.2049	13.845	66.3166	324.33	635.848							cell2	2.98922	100.18	351.421	535.526	680.659	995.226	1260.56
		cell6	3.19547	22.7313	76.9374	225.853	473.768	873.925	930.014							cell9	6.0251	7.6624	51.5031	185.943	280.032	426.066	530.495							cell3	8.14604	78.4892	190.97	294.301	367.294	548.031	467.68
		cell7	14.0289	56.9987	99.9732	165.101	215.521	734.568	1579.92							cell10	4.61947	6.42136	1.53683	0.135336	39.4511	100.647	218.218							cell4	3.17249	3.56287	17.5305	345.617	706.573	1783.12	1550.83
		cell8	16.1744	219.197	384.464	512.803	686.242	1114.19	1809.72							cell11	21.124	128.387	151.063	199.219	233.763	260.413	252.722							cell5	5.84405	5.87805	67.0515	242.257	205.725	301.784	421.087
		cell9	85.7824	384.092	492.457	599.192	797.157	1247.33	1196.72							cell12	4.9174	54.8418	155.979	234.239	263.041	338.502	353.158							cell6	127.588	187.384	227.318	295.789	342.343	430.632	644.9
		cell10	26.2677	628.763	1083.12	864.289	950.089	1781.47	1725.14							cell13	6.11194	12.8783	17.0278	67.0152	83.5473	118.472	115.81							cell7	21.1411	148.457	408.847	545.955	623.154	878.943	949.234
		cell11	5.64432	1.54735	153.736	895.735	1650.98	1456.18	1494.35							cell14	7.04414	34.1734	103.372	160.885	194.463	327.656	343.589							cell8	6.97642	9.59956	199.338	359.349	422.403	517.72	601.853
		cell12	3.76922	228.103	702.733	1118.02	1512.24	2108.74	2718.72							cell15	6.00686	54.9404	127.703	159.593	148.125	166.964	160.937							cell9	4.99195	85.328	150.679	204.099	242.526	436.581	558.696
		cell13	9.00108	191.817	403.549	642.208	1286.47	1391.62	1612.92							cell16	4.09595	19.7681	94.2731	166.238	202.534	350.515	480.372							cell10	5.99631	54.4784	273.786	376.006	397.214	442.683	474.347
		cell14	35.1272	367.019	558.189	724.755	831.239	987.62	1260.85							cell17	83.1118	177.337	242.045	237.553	255.584	293.803	277.259							cell11	5.0992	7.3147	137.493	296.673	358.533	435.338	827.849
		cell15	13.2566	135.653	206.369	271.845	343.882	518.659	739.845							cell18	6.7904	32.6508	59.8323	88.7566	76.3911	94.9391	102.604							cell12	9.23515	3.28863	15.5805	245.204	447.932	857.554	1571.01
		cell16	16.7461	282.639	536.767	641.345	834.368	1389.55	1524.16																					cell13	12.1274	5.37487	33.1181	98.882	306.747	943.111	1471.67
		cell17	7.70617	91.8404	243.519	416.851	569.836	957.793	1374.43																					cell14	4.30236	123.222	246.34	307.978	331.251	420.941	516.615
		cell18	11.4692	288.901	577.456	691.201	877.27	1226.41	1258.37																					cell15	2.01257	175.375	299.837	409.548	411.803	465.068	588.114
		cell19	21.7921	395.249	557.511	748.312	855.327	1158.69	1004.63																					cell16	2.04883	59.1024	284.135	471.887	567.41	594.187	560.303
																														cell17	12.9858	255.317	406.764	492.627	649.033	865.786	907.796
																														cell18	6.08261	5.18063	73.6097	177.445	263.564	378.314	414.022
																														cell19	47.7434	131.361	204.75	227.754	264.872	317.406	322.036
																														cell20	28.6684	108.165	126.305	161.016	200.453	262.764	341.084
																														cell21	6.23768	102.723	164.439	194.027	247.226	305.969	475.904
																														cell22	16.448	62.6039	236.613	307.733	274.712	408.962	469.696
																														cell23	6.29369	296.929	391.101	557.036	724.437	1135.47	1145.08
																														cell24	23.1206	180.017	249.853	283.925	386.868	468.813	620.955
																														cell25	0.548672	2.93798	21.0506	89.976	156.939	396.034	482.751
