# Supplementary material for: Distinct neurexin-cerebellin complexes control AMPA- and NMDA-receptor responses in a circuit-dependent manner
Source: eLife journal article supplement (doi:10.7554/elife.78649), 2022-10-07
Supplement: supp [file elife-78649-supp-v1.zip]

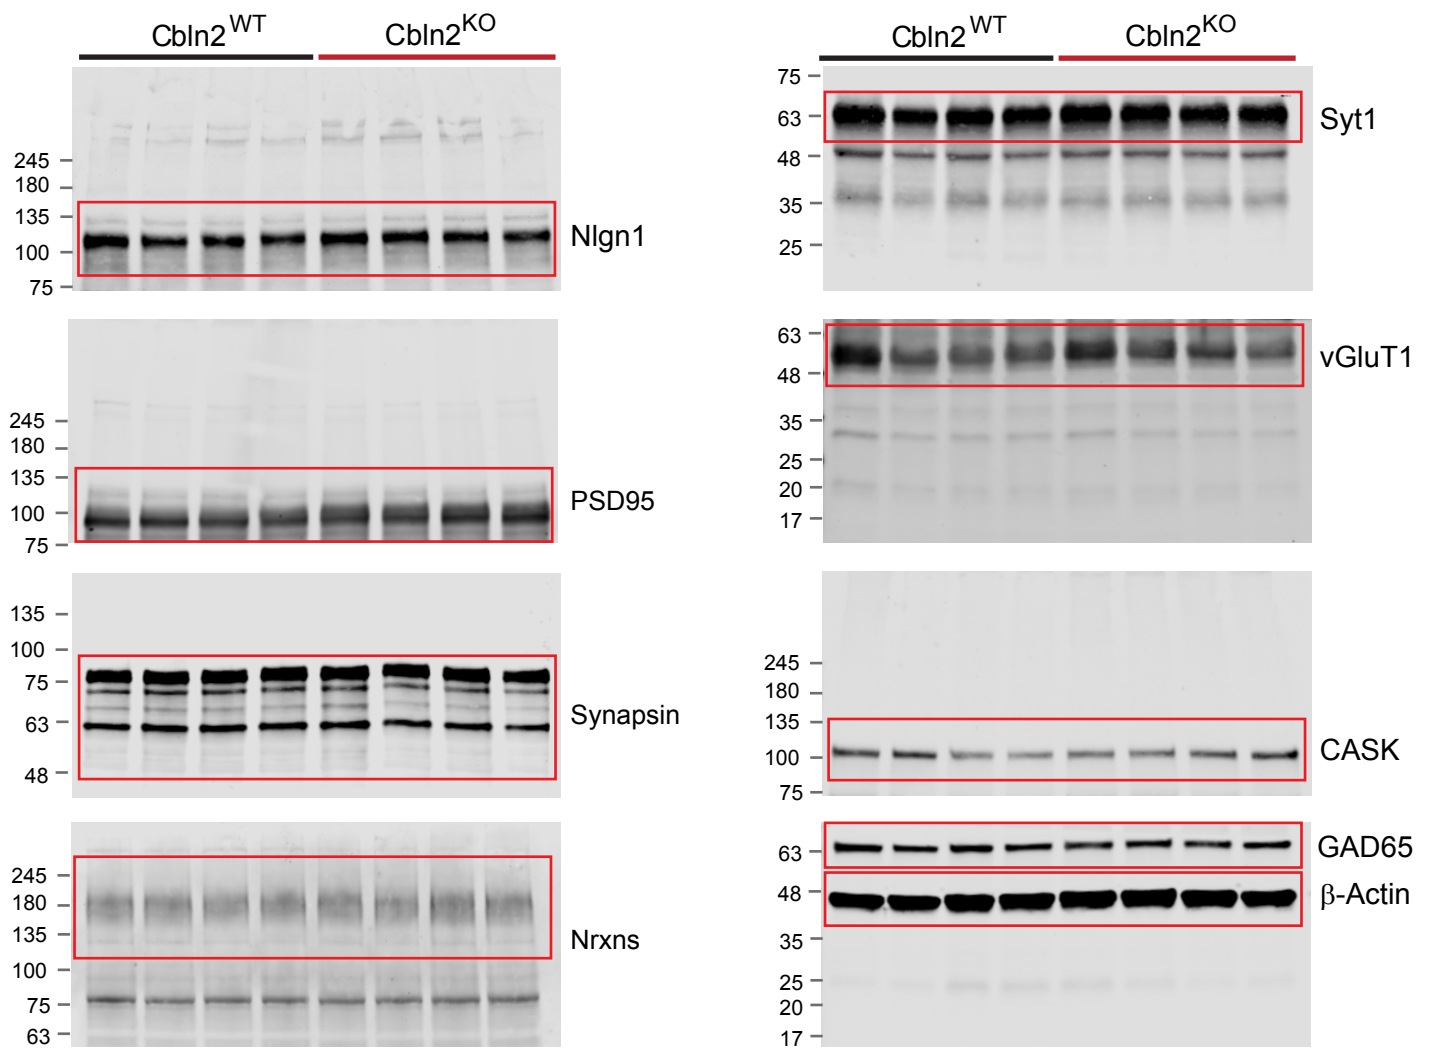

Figure 3-source data 1. All Original full-sized immunoblots correspond to Figure 3D (red boxes = sections shown).
