# Supplementary material for: Distinct neurexin-cerebellin complexes control AMPA- and NMDA-receptor responses in a circuit-dependent manner
Source: eLife journal article supplement (doi:10.7554/elife.78649), 2022-10-07
Supplement: supp [file elife_poa_e78649_Figure_1_figure_supplement_1_source_data_1.xlsx]

## Sheet: Sheet1
	Figure 1-figure supplement 1A	CV		Figure 1-figure supplement 1B	CV
two-tailed unpaired t-test p-values		p = 0.33135			p = 0.74461
		Cbln2+/+	Cbln2-/-		Cbln2+/+	Cbln2-/-
		0.142455	0.187631		0.34977	0.231563
		0.229956	0.0554434		0.155795	0.160472
		0.216888	0.165096		0.211572	0.0930131
		0.122759	0.0651553		0.142455	0.336301
		0.414218	0.134286		0.307371	0.248345
		0.1948	0.126836		0.225915	0.340684
		0.100113	0.145116		0.195288	0.258792
		0.267517	0.110269		0.226668	0.133999
		0.163549	0.132169		0.171161	0.306822
		0.110854	0.216538		0.286158	0.221917
		0.139569	0.35038		0.256686	0.117833
		0.127112	0.135156		0.157649	0.272391
		0.160938	0.167715		0.0468696	0.332881
		0.181853	0.293142		0.405184	0.145398
		0.35577	0.270857		0.167715	0.187905
		0.246655	0.223782		0.224111
		0.285867			0.471205
		0.209208			0.260603
		0.154429			0.289191
					0.206622
					0.195915
