# Supplementary material for: Distinct neurexin-cerebellin complexes control AMPA- and NMDA-receptor responses in a circuit-dependent manner
Source: eLife journal article supplement (doi:10.7554/elife.78649), 2022-10-07
Supplement: supp [file elife_poa_e78649_Figure_5_source_data_1.xlsx]

## Sheet: Sheet1
	Figure5B		Stimulation Itensity (mA)							Slope		Figure5C		Interstimulus interval (ms)					Figure5D		Stimulation Itensity (mA)							Slope		Figure5E		Interstimulus interval (ms)					Figure5G	Cbln12f/f	Cbln12dcko	Cbln12f/f	Cbln12dcko	Figure5I	Cbln12f/f	Cbln12dcko	Cbln12f/f	Cbln12dcko	Figure5D		Stimulation Itensity (mA)
two-tailed unpaired t-test p-values	AMPAR EPSCs	Cbln12f/f	10	20	30	40	50	75	100	p = 0.02988			Cbln12f/f	20	80	200	800	2000	NMDAR EPSCs	Cbln12f/f	10	20	30	40	50	75	100	p = 0.00102			Cbln12f/f	20	80	200	800	2000		p = 0.01979		p = 0.03812			p = 0.01562		p = 0.01047		NMDAR EPSCs	Cbln12f/f	10
with comparing to control for all panels	Cbln12dcko to Cbln12f/f : p < 0.0001	cell1	1.6038	6.09115	18.1045	24.1743	41.4336	81.5744	89.837	Cbln12f/f	Cbln12dcko		cell1	1.3772	1.65385	1.45836	0.823582	1.30289	Cbln12dcko to Cbln12f/f : p < 0.0001	cell1	6.456	28.6778	46.9985	72.5656	76.2081	72.4564	78.55	Cbln12f/f	Cbln12dcko		cell1	1.57495	1.44852	1.23731	1.00242	1.01645		mEPSC Frequency (Hz)		mEPSC Amplitude (pA)			mEPSC Frequency (Hz)		mEPSC Total Charge (pC)		Cbln12dcko to Cbln12f/f : p < 0.0001	cell1	6.456
except input/output curves and PPR using two-way ANOVA		cell2	2.64836	13.5841	17.3636	102.102	102.045	70.7178	103.307	0.977428	4.40419		cell2	1.60809	1.14137	1.33768	1.27424	0.822223		cell2	11.7236	153.926	269.398	356.345	390.299	427.554	347.688	1.8339	1.6711		cell2	1.12222	1.17163	1.10765	0.810007	0.900638		0.2033	3.0667	10.8944	17.3793		0.12	0.1867	0.138	0.3158	Cbln12dcko + Nrxn1 bSS4+ to Cbln12f/f : p < 0.0001	cell2	11.7236
		cell3	8.39109	63.9579	105.464	157.974	214.893	236.525	275.945	2.87312	1.80726		cell3	2.59928	1.35673	0.904679	0.998481	1.07974		cell3	34.0653	255.247	455.145	503.829	495.141	511.008	479.239	9.5957	7.1364		cell3	1.02253	1.10204	0.989031	0.960276	1.03666		0.15	0.8667	11.8066	11.6452		0.15	0.22	0.8131	0.4285	Cbln12dcko + Nrxn1 bSS4- to Cbln12f/f : p < 0.0001	cell3	34.0653
		cell4	3.94478	48.5512	113.239	210.864	218.814	239.019	223.332	5.07019	3.79654		cell4	2.16786	1.28628	1.2688	1.13775	1.32367		cell4	12.1334	67.892	155.781	242.668	269.835	310.051	333.282	11.7073	3.4494		cell4	1.22975	1.08347	1.03905	0.863362	0.95072		0.3833	0.2267	14.961	11.1596		0.22	0.1433	0.4943	0.2138		cell4	12.1334
		cell5	3.74519	21.6146	137.754	209.224	253.503	275.688	412.069	5.9205	1.78265		cell5	1.80697	1.72875	1.09285	0.986137	0.800333		cell5	6.08796	80.1567	182.217	253.273	302.976	351.276	367.531	6.9018	3.7847		cell5	1.28413	1.15409	1.09137	0.972968	0.916408		0.7433	0.1867	10.7606	12.7118		0.1033	0.14	0.4943	0.0997		cell5	6.08796
		cell6	2.26235	17.0877	70.1854	122.578	143.137	181.887	183.101	6.87125	5.26367		cell6	2.55481	1.09323	1.07871	1.12047	1.05784		cell6	7.4194	117.564	289.383	400.013	498.013	590.201	618.296	7.6689	6.0914		cell6	1.22515	1.23098	0.963357	0.94566	1.00168		0.37	0.2233	11.0034	11.354		0.22	0.14	0.4239	0.0739		cell6	7.4194
		cell7	3.48564	109.215	232.886	434.454	451.797	636.276	718.101	3.87239	9.87064		cell7	1.35507	1.11513	1.60351	1.1606	0.601559		cell7	5.92321	81.3918	189.633	294.753	426.311	528.976	566.563	12.6364	9.9789		cell7	1.13937	1.0786	1.03823	0.909941	0.850155		1.2867	0.34	10.8235	11.972		0.25	0.37	0.522	0.3932		cell7	5.92321
		cell8	14.5317	8.89805	36.1853	51.3099	31.7867	82.9407	128.617	12.2186	8.31309		cell8	2.37577	1.36895	1.06723	1.10843	0.909528		cell8	10.1763	127.595	365.823	571.041	760.144	951.071	977.221	10.5414	5.8634		cell8	1.24069	1.02848	0.879047	0.916783	0.834637		0.6367	2.2417	12.1453	13.0205		0.12	0.44	0.4736	0.423		cell8	10.1763
		cell9	2.23187	19.3343	132.653	170.846	197.379	351.928	352.301	0.769218	7.19737		cell9	1.8917	1.71488	1.25233	1.34075	0.962106		cell9	58.1804	224.55	426.102	619.321	658.661	750.572	769.103	19.4338	8.9686		cell9	1.32168	1.0036	0.94443	0.860542	0.916889		0.36	2.6944	11.2295	21.8149		0.1633	0.5389	0.4163	0.5166		cell9	58.1804
		cell10	4.63431	18.9584	54.846	59.1497	79.3646	148.436	210.848	5.41805	3.47604		cell10	1.35474	1.27818	1.129	0.825943	0.703948		cell10	42.7757	153.223	281.833	384.719	441.357	532.902	613.613	15.9573	8.3153		cell10	0.951998	1.18372	1.14226	0.815532	0.987694		0.4133	0.3567	10.1435	13.0964		0.0967	0.31	0.4146	0.4201		cell10	42.7757
		cell11	5.44662	144.034	168.454	223.321	322.168	521.941	431.239	1.89652	2.18737		cell11	1.93625	1.7972	1.25784	0.876744	0.927325		cell11	24.9889	155.606	353.602	463.571	581.658	736.302	739.778	10.2866	4.4612		cell11	1.37071	1.45047	1.17118	1.00647	0.982186		0.26	0.6167	11.7585	9.9348		0.0933	0.3167	0.1027	0.3499		cell11	24.9889
		cell12	5.90365	15.5141	41.0196	88.8984	110.158	230.116	244.127	7.12731	1.84283		cell12	1.70726	1.08982	1.88202	0.831726	0.805515		cell12	17.2035	88.0486	184.266	257.83	340.9	444.382	473.81	14.213	9.599		cell12	1.30343	1.17612	0.948506	0.870008	1.03801		0.5667	1.1767	12.188	12.7326		0.1567	0.3667	0.4068	0.028		cell12	17.2035
		cell13	2.80335	44.7632	143.772	168.059	296.356	425.258	516.149	2.81892	8.39736		cell13	1.24312	0.865441	1.19605	1.01015	0.832948		cell13	44.6798	169.408	346.819	485.324	587.398	736.011	808.738	8.1717	7.4654		cell13	1.66803	1.30843	1.04003	0.840312	0.885042		0.28	1.25	11.0315	17.4671		0.1889	0.45	0.9422	0.3293		cell13	44.6798
		cell14	4.56886	53.5702	105.525	165.701	130.176	212.254	271.553	7.10401	2.75099		cell14	1.78667	1.27257	1.30633	0.891931	1.14804		cell14	32.2742	138.863	273.021	433.467	563.613	725.127	755.769	14.0135	3.5298		cell14	1.49092	1.42842	1.03688	0.765086	1.07661		0.2633	1.5917	9.4924	15.8536		0.2133	0.8667	0.4554	0.5531		cell14	32.2742
		cell15	5.2355	40.2065	45.2717	82.7336	132.043	221.785	226.205	3.63346	2.4934		cell15	0.992523	1.12519	1.60358	1.05009	1.89614		cell15	47.1219	119.415	301.896	380.619	392.943	494.317	497.721	13.5728	4.7947		cell15	1.26069	1.0818	0.983918	0.978762	0.962444		0.9733	0.4933	9.6898	12.6897		0.1167	0.16	0.5505	0.2887		cell15	47.1219
		cell16	5.12359	47.4783	134.896	209.22	267.956	386.013	431.061	2.96142	7.58244		cell16	2.21935	1.54862	1.14832	1.03979	1.10847		cell16	10.4029	75.2303	113.798	160.434	192.624	231.89	273.206	9.5285	9.331		cell16	1.27548	1.1965	1.14666	1.01698	1.04279		0.4133	0.38	12.6996	10.5685		0.15	0.2882	0.6645	0.3989		cell16	10.4029
		cell17	2.73164	25.4536	69.6456	187.969	289.216	542.383	671.655	6.87406	6.29657		cell17	2.41868	1.5132	1.32901	1.20165	1.05549		cell17	17.8696	103.577	192.551	264.29	290.344	404.58	438.289	4.4965	8.0124		cell17	1.27134	1.1704	1.03787	1.00451	0.912169		0.1867	0.65	9.0985	8.4752			0.1333		0.1478		cell17	17.8696
		cell18	8.09152	118.38	165.863	197.252	249.61	313.416	361.704	7.35484	1.8672		cell18	1.78431	1.59124	1.15773	0.941998	1.07157		cell18	76.6526	229.527	288.028	311.093	316.954	399.536	337.962	7.0566	13.0786		cell18	1.31574	1.14833	1.06467	0.963435	0.923923		0.17	1.1267	11.7553	12.6876			0.1367		0.2642		cell18	76.6526
		cell19	2.99345	20.6625	40.3371	35.0432	49.0821	30.9525	68.5262	5.61908	10.4355		cell19	1.82688	1.25305	1.31755	0.719818	1.04738		cell19	79.5615	190.652	291.813	312.755	348.698	395.229	377.889	5.6217	6.3058		cell19	0.863321	1.05899	0.866149	0.784874	0.825105			0.7667		11.3099			0.0833		0.5503		cell19	79.5615
		cell20	5.41633	52.7652	145.353	191.01	320.374	429.031	436.873	1.06558	19.8959		cell20	1.3191	1.02303	1.3914	0.858808	0.707861		cell20	29.4056	131.279	279.322	351.069	392.848	446.913	429.953	6.6038	9.2383		cell20	1.39286	1.21272	1.21027	0.984138	0.995255			0.7433		14.1018			0.1722		0.1653		cell20	29.4056
		cell21	6.95964	19.139	49.1841	89.2371	103.059	210.932	246.33	7.68159	0.964102		cell21	1.68859	1.17321	1.06143	0.803857	1.06075		cell21	113.373	278.383	449.633	530.214	610.803	767.463	744.44	9.4667	7.6283		cell21	1.19594	1.16294	1.02636	0.890079	0.976291			0.46		10.2776							cell21	113.373
		cell22	43.8006	205.268	277.396	277.247	260.924	299.6	339.567	2.62298	2.01753		cell22	1.01666	0.843294	0.896835	0.978126	0.852805		cell22	19.3001	79.4933	159.847	225.993	310.759	428.526	436.731	12.4669	10.7782		cell22	1.24269	1.00474	0.878444	1.07077	1.04643												cell22	19.3001
		cell23	9.58324	110.746	116.046	162.406	197.489	529.223	511.7	5.06225	2.38119		Cbln12dcko							cell23	17.174	89.7707	234.233	297.197	380.616	562.838	629.349	7.2942	11.4595		cell23	1.43752	1.34251	1.23062	0.756703	1.11444												cell23	17.174
		cell24	3.83294	14.8637	27.5483	32.0204	33.9193	81.1369	97.0687	4.27472	1.65998		cell1	1.67428	1.34463	1.30137	0.726288	0.987546		cell24	4.7321	9.85315	40.6573	81.7871	113.442	208.29	223.143	9.3431	3.2027		cell24	1.98586	1.49874	1.07765	0.932827	1.08755												cell24	4.7321
		cell25	1.72186	31.4561	31.9263	59.7281	71.3215	165.379	221.653	0.773295	9.04931		cell2	1.70277	1.11757	1.14656	1.0874	1.10749		cell25	11.6158	20.8623	79.7818	145.825	241.739	360.543	388.756	2.8935	3.1181		cell25	1.09833	1.04707	1.00841	0.817017	0.869106												cell25	11.6158
		cell26	6.01005	56.6305	122.146	215.705	296.611	454.917	496.666	1.67471	9.38538		cell3	1.00489	1.40971	1.09194	0.665453	0.754013		cell26	5.93431	22.6649	68.643	187.624	289.848	390.501	533.013	5.8521	7.7751		cell26	1.45027	1.16002	0.871288	0.993923	1.03382												cell26	5.93431
		cell27	8.40144	29.6739	71.814	121.127	131.492	129.291	90.0377	7.40275	4.10716		cell4	2.34791	1.43578	1.06562	0.976425	1.11111		cell27	6.26393	41.1761	142.236	191.8	224.917	376.395	476.778	7.3279	7.5864		cell27	1.28584	1.22726	1.09041	0.994826	0.889385												cell27	6.26393
		cell28	0.755164	15.5208	73.7662	178.489	213.664	402.016	458.887	3.37634	4.69133		cell5	1.12611	1.08861	1.02318	0.772866	0.896999		cell28	8.18187	66.7696	98.1472	125.868	143.583	178.195	199.012	5.8793	1.839		Cbln12dcko																	cell28	8.18187
		cell29	2.63825	87.2374	155.621	222.869	391.464	482.12	468.906	5.88785	12.2477		cell6	0.984601	1.04495	0.955834	0.825885	1.01422		cell29	9.1962	67.2991	88.1432	130.559	150.92	222.674	249.146	3.299	5.8921		cell1	1.05368	1.19219	0.999112	0.932351	0.842998												cell29	9.1962
		Cbln12dcko								9.13284	3.76232		cell7	1.31814	1.34711	0.859124	1.0265	0.879088		cell30	8.19678	30.6536	88.2429	151.79	210.789	370.057	417.488	3.4671	7.7929		cell2	1.28683	1.35706	1.20987	1.0656	1.09254												cell30	8.19678
		cell1	32.9447	168.747	225.734	208.626	233.215	255.986	215.459		4.37581		cell8	1.81679	1.27091	1.10221	1.09573	0.92136		cell31	16.3349	102.338	233.252	388.064	491.939	615.362	619.247	5.2632	3.8827		cell3	2.07176	1.48781	0.898873	0.933906	0.992965												cell31	16.3349
		cell2	10.7789	50.4004	81.4863	52.3236	100.18	108.466	118.963		15.5579		cell9	1.46363	1.29937	1.01365	0.458325	1.67108		cell32	36.2579	153.659	240.38	424.094	517.141	636.592	685.337	12.3693	4.4399		cell4	1.30851	1.38686	1.07829	0.864554	0.960354												cell32	36.2579
		cell3	81.0476	231.474	225.198	234.089	269.567	266.773	324.857		14.9208		cell10	2.04	1.67711	1.57934	1.02791	0.867471		cell33	35.879	225.016	434.247	581.709	621.112	723.155	757.014	12.322	8.5542		cell5	1.11348	0.965555	1.06537	0.912841	0.915806												cell33	35.879
		cell4	6.81115	23.2789	27.7302	60.8382	77.1639	109.8	144.357		11.9601		cell11	2.07999	1.86695	1.37911	0.830818	0.962577		Cbln12dcko								15.2716	4.2408		cell6	1.57433	1.25908	1.04492	0.886692	0.973415												Cbln12dcko
		cell5	24.9087	46.9814	82.6551	133.135	245.015	319.386	346.175		11.1835		cell12	1.5451	1.42648	1.62513	1.15541	1.77018		cell1	32.2697	56.3823	101.283	99.792	94.1196	89.3163	79.8432		2.1224		cell7	1.34324	1.04317	0.966816	0.83796	0.917706												cell1	32.2697
		cell6	4.72287	18.4288	154.715	272.198	371.37	397.323	471.034		11.3833		cell13	1.83912	1.7929	1.14401	1.25433	1.27071		cell2	25.889	120.971	198.877	262.892	311.75	380.815	382.807		0.8988		cell8	1.56431	1.34268	0.947657	0.822076	0.87365												cell2	25.889
		cell7	45.3624	138.067	138.745	244.307	407.897	642.735	766.179		13.6593		cell14	2.84066	1.63339	2.21052	0.867055	1.58066		cell3	2.28023	23.7282	64.1566	110.259	131.483	197.811	195.416		1.7212		cell9	1.49205	1.4781	1.07283	0.963064	0.909367												cell3	2.28023
		cell8	2.60313	52.5455	137.749	215.031	281.229	431.149	582.01		16.7549		cell15	1.9718	1.77252	0.872844	0.772222	1.10768		cell4	10.0195	39.453	86.9295	117.559	160.201	194.926	190.298		3.8499		cell10	1.13905	1.12976	1.06333	0.963037	1.17104												cell4	10.0195
		cell9	11.2288	68.7473	111.436	102.735	168.037	224.036	234.098		8.19496		cell16	1.17871	1.07153	0.982009	1.18558	1.1568		cell5	14.4196	65.9798	117.179	193.31	255.324	306.941	279.704				cell11	1.16713	1.05068	1.29224	0.796247	1.05713												cell5	14.4196
		cell10	5.131	19.2588	34.7612	45.0597	101.599	153.742	228.244				cell17	1.26286	1.23014	0.859223	0.882152	0.975086		cell6	32.7698	156.411	284.435	358.281	430.777	538.448	561.586				cell12	1.39532	1.41045	1.12626	1.16424	1.01247												cell6	32.7698
		cell11	4.06022	18.7594	51.5659	52.0563	79.5532	178.01	169.667				cell18	2.41868	1.5132	1.32901	1.20165	1.05549		cell7	5.30859	57.5839	95.3954	151.328	251.607	555.65	527.662				cell13	1.34748	1.39813	1.07386	0.913098	1.03323												cell7	5.30859
		cell12	1.87927	49.3275	166.878	274.202	309.31	388.189	467.435				cell19	2.61893	1.62366	1.02171	1.13025	0.927183		cell8	11.2984	62.4962	156.496	286.268	347.842	430.099	429.323				cell14	1.34095	1.16572	1.12248	0.777888	0.95199												cell8	11.2984
		cell13	0.334818	39.1731	58.0764	82.1268	116.408	91.8387	106.446				cell20	1.74928	1.21886	1.13338	0.823792	1.01286		cell9	11.6834	71.7584	175.687	266.888	329.883	384.117	363.739				cell15	1.13093	1.10682	1.0361	0.932013	0.963577												cell9	11.6834
		cell14	3.20078	11.1281	58.5307	69.4334	98.718	122.413	154.567				cell21	2.48278	1.51243	0.990633	0.767425	1.18677		cell10	3.68205	41.5875	88.9009	150.464	172.304	287.226	276.498				cell16	1.24928	1.10378	1.12869	0.883452	0.937785												cell10	3.68205
		cell15	2.60247	16.7114	136.718	220.203	279.979	406.263	477.324				cell22	2.48646	1.79757	1.41032	1.05633	0.844912		cell11	7.66609	57.3902	121.718	189.127	236.403	258.245	282.362				cell17	1.30287	1.41751	1.04935	1.0556	1.02451												cell11	7.66609
		cell16	5.24501	107.326	147.948	211.146	268.164	342.221	424.932				cell23	1.77093	1.32763	0.687198	1.16745	1.15203		cell12	10.9359	85.677	167.696	282.296	392.576	447.273	452.473				cell18	1.51254	1.2929	1.18619	0.888514	0.906134												cell12	10.9359
		cell17	2.02972	12.0443	8.77104	44.1248	79.3493	92.8112	150.249				cell24	1.9782	1.56316	1.48897	0.962812	1.09552		cell13	5.2533	62.2413	201.886	230.356	294.464	375.893	396.567				cell19	1.34284	1.10887	1.01443	0.93286	0.986263												cell13	5.2533
		cell18	0.118763	40.8232	162.974	252.24	416.186	638.491	791.472				cell25	2.09152	1.38635	1.14384	1.16497	0.846514		cell14	14.6768	21.2234	79.4185	108.19	147.683	207.197	262.553				cell20	1.28848	1.01101	1.09193	0.840683	0.909717												cell14	14.6768
		cell19	12.7033	124.836	367.306	507.202	816.315	1349.82	1507.83				cell26	1.51972	1.3122	1.20216	0.737449	1.01234		cell15	11.8395	74.236	170.151	260.655	308.275	427.605	482.836				cell21	1.054	0.901924	0.951365	0.87042	0.929991												cell15	11.8395
		cell20	3.42584	75.9618	46.1778	49.2761	64.9738	143.583	140.776				cell27	1.40371	1.42451	0.928656	1.08913	0.928484		cell16	6.3764	83.1908	121.803	163.619	205.899	356.137	393.21				cell22	1.02097	1.04003	0.966643	0.844954	0.890809												cell16	6.3764
		cell21	61.3522	97.5885	98.656	144.243	138.901	289.148	323.862				cell28	1.48923	1.3114	1.05513	0.95294	0.813099		cell17	14.2544	51.1349	101.759	137.471	165.222	242.687	276.229				cell23	1.3161	1.29324	1.03149	0.873372	0.995343												cell17	14.2544
		cell22	2.31276	23.9626	74.4118	77.0929	94.8072	198.546	163.864				cell29	2.02087	1.37778	0.918845	0.717458	1.12753		cell18	22.5766	70.52	193.971	279.025	384.876	479.115	550.172				cell24	1.29361	1.1902	1.07037	0.888442	1.00244												cell18	22.5766
		cell23	1.43239	13.1124	25.0018	20.419	80.7779	95.8443	124.3				cell30	1.49964	1.42244	1.19048	1.11276	1.0001		cell19	11.2268	69.5514	160.873	234.437	329.404	392.471	475.321				cell25	1.74568	0.917599	0.897545	0.973726	0.937918												cell19	11.2268
		cell24	3.0231	41.4596	170.917	219.673	366.382	405.847	444.385				cell31	1.22021	1.51206	1.15208	0.849151	1.01952		cell20	34.0725	188.238	331.343	481.534	541.357	672.909	780.716				cell26	1.34211	1.06705	1.01381	0.943221	1.03												cell20	34.0725
		cell25	7.13893	121.693	159.939	335.918	369.295	503.889	549.637											cell21	8.13877	147.487	181.028	193.717	207.017	298.5	290.469				cell27	1.1702	1.03214	1.0714	0.833941	1.01014												cell21	8.13877
		cell26	2.10844	36.4466	80.3805	148.267	151.556	264.692	348.21											cell22	9.38971	93.4008	156.082	224.269	259.244	322.361	332.243				cell28	1.46312	1.52015	0.983909	0.846161	0.887626												cell22	9.38971
		cell27	3.72304	23.4657	42.1653	141.288	179.379	249.237	302.67											cell23	28.5307	101.914	204.25	308.858	352.769	427.352	428.824				cell29	1.12009	1.27441	1.23417	0.929232	0.95729												cell23	28.5307
		cell28	11.1687	65.523	113.847	348.414	482.106	702.267	755.631											cell24	10.7582	76.2524	229.399	318.683	351.457	413.393	418.112				cell30	1.56328	1.35141	0.999505	0.882355	0.871804												cell24	10.7582
		cell29	1.75474	54.9034	70.8965	102.568	166.038	245.297	258.145											cell25	20.1335	103.374	222.979	264.267	321.1	331.101	275.958				cell31	1.43859	1.21442	0.989146	0.893997	0.987205												cell25	20.1335
		cell30	2.23384	1.9112	76.938	112.407	165.777	353.718	290.753											cell26	6.37396	77.6793	186.906	304.433	431.906	515.571	524.38																					cell26	6.37396
		cell31	5.95384	17.4537	220.994	376.827	604.164	696.853	722.567											cell27	3.78797	78.6663	186.279	336.478	447.856	555.069	532.055																					cell27	3.78797
		cell32	27.8277	193.101	373.458	458.042	641.397	890.92	905.215											cell28	17.5334	73.8439	120.185	136.359	146.41	159.31	139.188																					cell28	17.5334
		cell33	15.2572	136.869	202.423	306.589	528.403	679.904	714.168											cell29	10.4988	49.1474	77.5647	133.161	180.531	264.145	285.627																					cell29	10.4988
		cell34	14.592	111.297	138.536	233.831	512.5	820.298	768.798											cell30	10.8528	51.3015	81.0847	119.284	132.769	187.698	207.389																					cell30	10.8528
		cell35	2.61646	56.5441	188.268	315.869	442.117	762.844	754.691											cell31	19.6257	106.81	193.477	263.474	330.05	383.367	385.728																					cell31	19.6257
		cell36	8.4536	137.418	229.841	387.73	566.263	762.464	792.077											cell32	20.7244	111.03	218.213	260.599	325.262	384.765	392.757																					cell32	20.7244
		cell37	1.84069	71.133	251.145	430.125	660.092	968.35	1108.07											cell33	2.96096	33.0573	45.5698	75.5435	87.8385	123.227	117.745																					cell33	2.96096
		cell38	8.47905	89.1661	157.68	301.491	312.064	571.719	1021.89											cell34	9.24066	15.0556	25.5007	42.7131	40.3535	65.3423	66.3231																					cell34	9.24066
																				cell35	2.06929	0.967559	15.0099	30.1479	79.4294	171.897	169.562																					cell35	2.06929
																				cell36	2.02294	7.34385	20.5121	38.761	72.3758	138.962	147.726																					cell36	2.02294
																				cell37	3.31191	4.74959	37.0456	100.895	147.733	315.865	397.131																					cell37	3.31191
																																																Cbln12dcko + Nrxn1bSS4+
																																																cell1	2.92338
																																																cell2	0.957012
																																																cell3	12.8788
																																																cell4	5.94791
																																																cell5	17.0944
																																																cell6	20.7898
																																																cell7	15.2661
																																																cell8	16.1992
																																																cell9	17.9569
																																																cell10	2.27884
																																																cell11	6.2087
																																																cell12	2.7327
																																																cell13	6.39805
																																																cell14	4.03405
																																																cell15	10.3967
																																																cell16	18.5608
																																																cell17	3.12417
																																																cell18	11.003
																																																cell19	1.9138
																																																cell20	1.95069
																																																cell21	3.82988
																																																cell22	3.45218
																																																cell23	6.27809
																																																cell24	1.66819
																																																Cbln12dcko + Nrxn1bSS4-
																																																cell1	20.2197
																																																cell2	5.1471
																																																cell3	32.2116
																																																cell4	29.3066
																																																cell5	15.1337
																																																cell6	66.7136
																																																cell7	22.5241
																																																cell8	1.37257
																																																cell9	6.46377
																																																cell10	7.57544
																																																cell11	4.0985
																																																cell12	7.67086
																																																cell13	8.18423
																																																cell14	5.18185
																																																cell15	15.8203
																																																cell16	7.78022
																																																cell17	10.7665
																																																cell18	8.04923
																																																cell19	3.50509
																																																cell20	7.07689
																																																cell21	0.932088
																																																cell22	0.901501
																																																cell23	0.58259
																																																cell24	3.04823
																																																cell25	3.90638
																																																cell26	1.76842
																																																cell27	4.90577
																																																cell28	1.27295
[truncated: 16 more columns]
